# Supplementary material for: Synthesis and solid-state structures of gold(i) complexes of diphosphines
Source: Royal Society of Chemistry journal article supplement (doi:10.1039/c6nj00786d), 2016-01-01
Supplement: c6nj00786d1.pdf [file c6nj00786d1.pdf]

## Synthesis and Solid-State Structures of Gold(I) Complexes of Diphosphines

Sebastian Molitor, Christoph Mahler and Viktoria H. Gessner\*

Institut für Anorganische Chemie, Julius-Maximilians-Universität Würzburg, Am Hubland, 97074  
Würzburg, Germany

### Index

|                                                  |     |
|--------------------------------------------------|-----|
| 1. NMR spectra                                   | S1  |
| 2. Crystal Structure Determination               | S15 |
| 2.1 Crystal Structure Determination of <b>1d</b> | S18 |
| 2.2 Crystal Structure Determination of <b>1f</b> | S19 |
| 2.3 Crystal Structure Determination of <b>2a</b> | S21 |
| 2.4 Crystal Structure Determination of <b>2b</b> | S24 |
| 2.5 Crystal Structure Determination of <b>2c</b> | S26 |
| 2.6 Crystal Structure Determination of <b>2d</b> | S28 |
| 2.7 Crystal Structure Determination of <b>2e</b> | S30 |
| 2.8 Crystal Structure Determination of <b>2h</b> | S35 |
| 3. References                                    | S37 |

1.  $^1\text{H}$  NMR,  $^{13}\text{C}\{^1\text{H}\}$  NMR,  $^{13}\text{C}\{^1\text{H}\}$  DEPT135 NMR and  $^{31}\text{P}\{^1\text{H}\}$  NMR spectra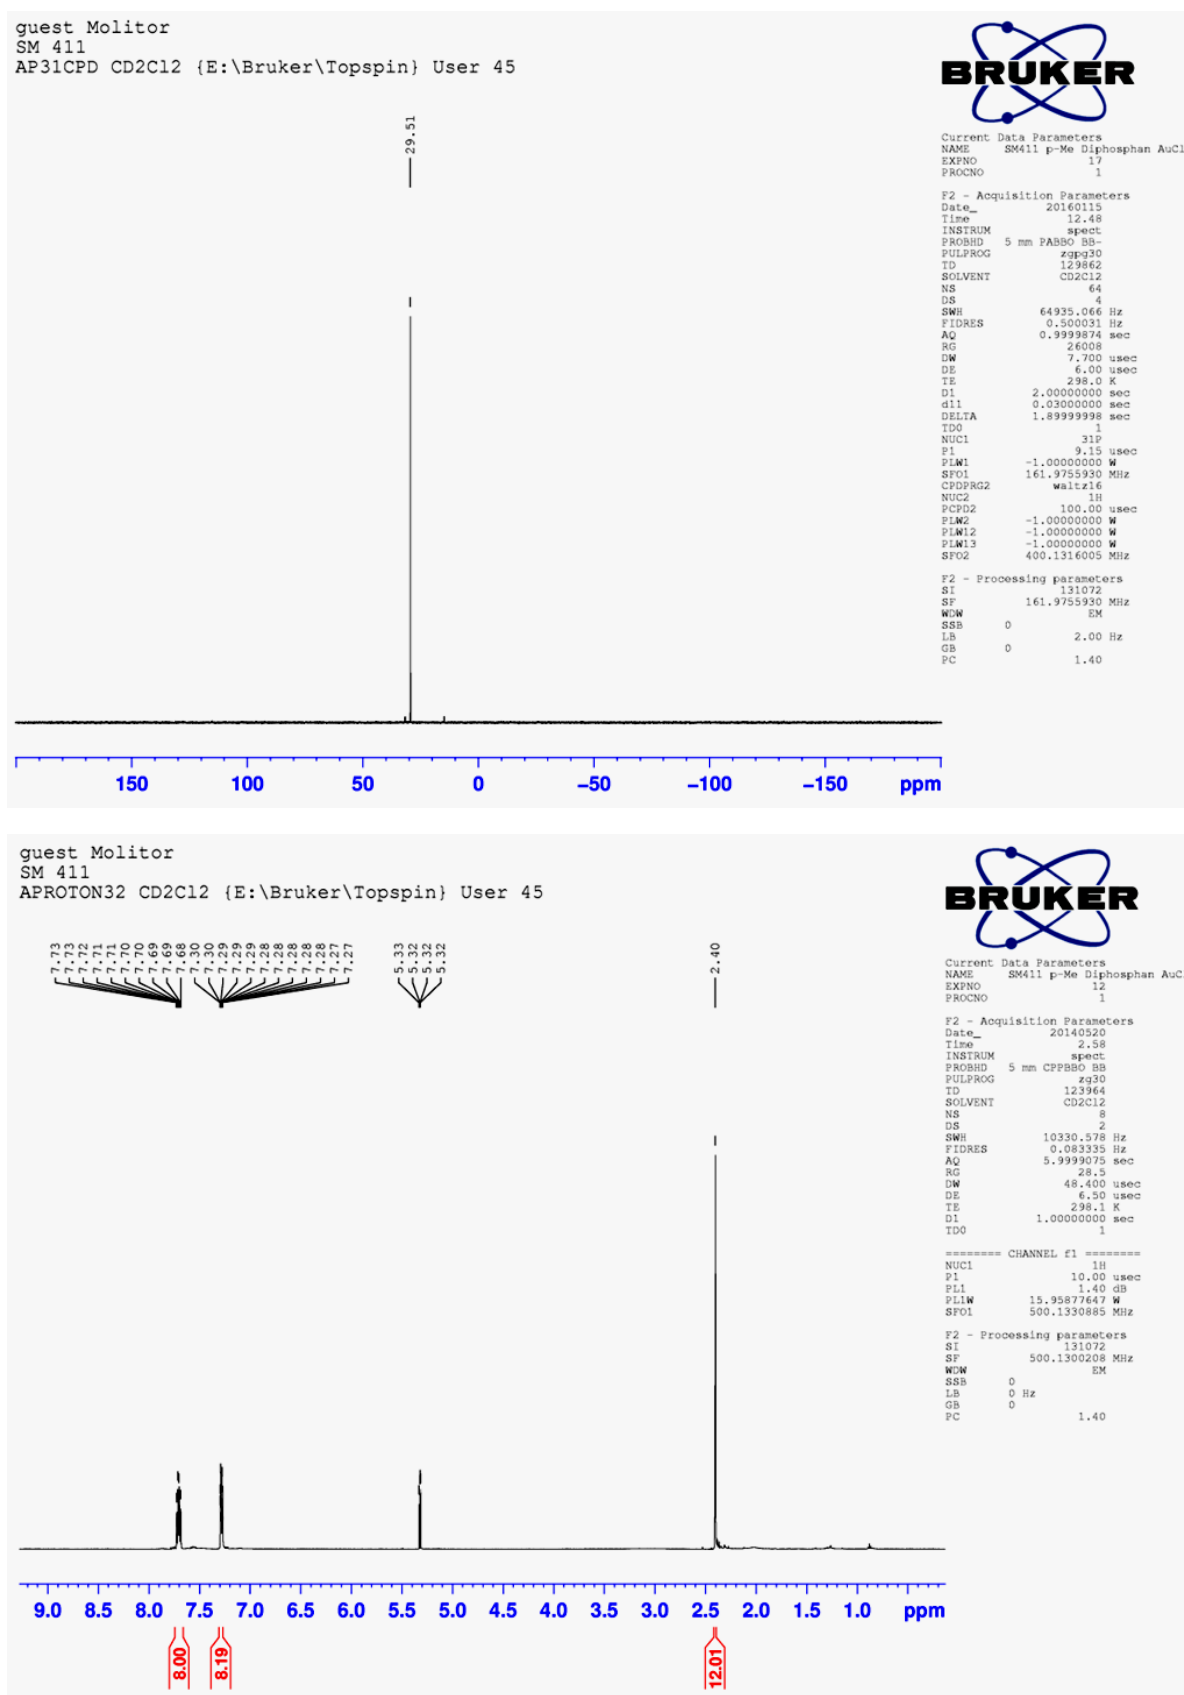Figure S1a.  $^{31}\text{P}\{^1\text{H}\}$  NMR and  $^1\text{H}$  NMR spectra of **2a**.

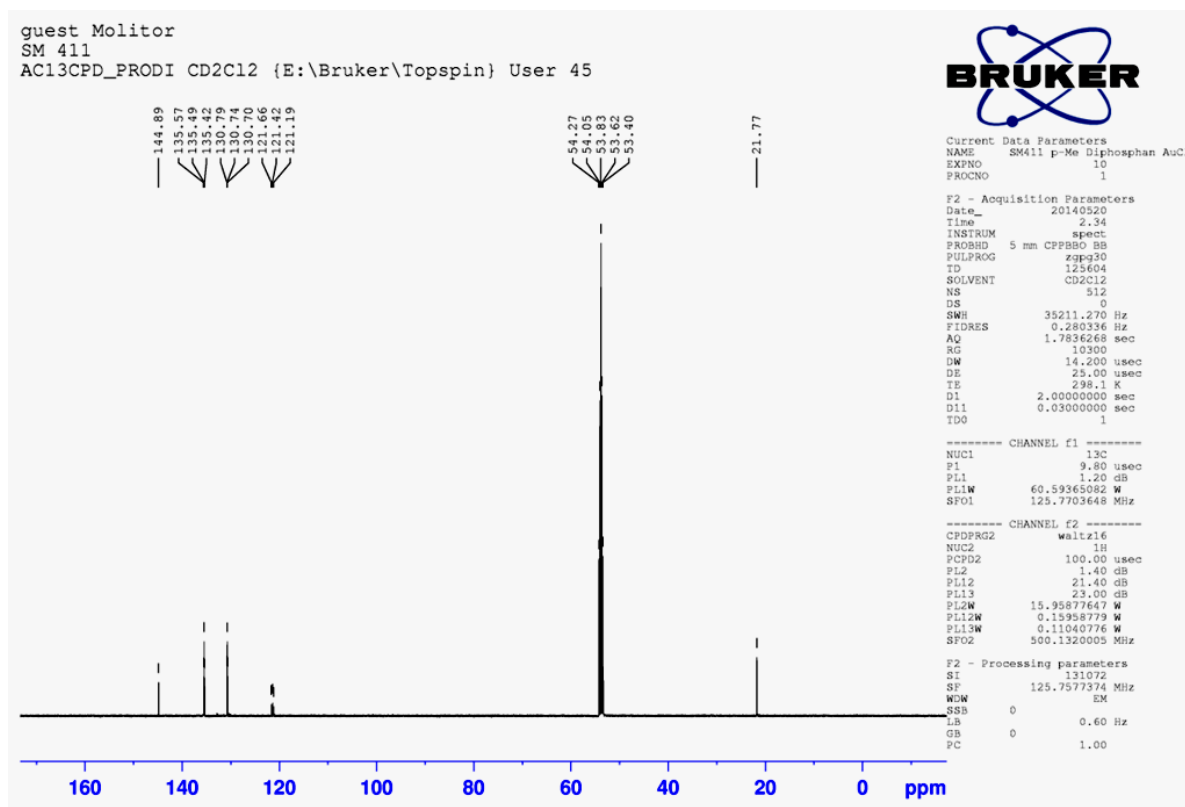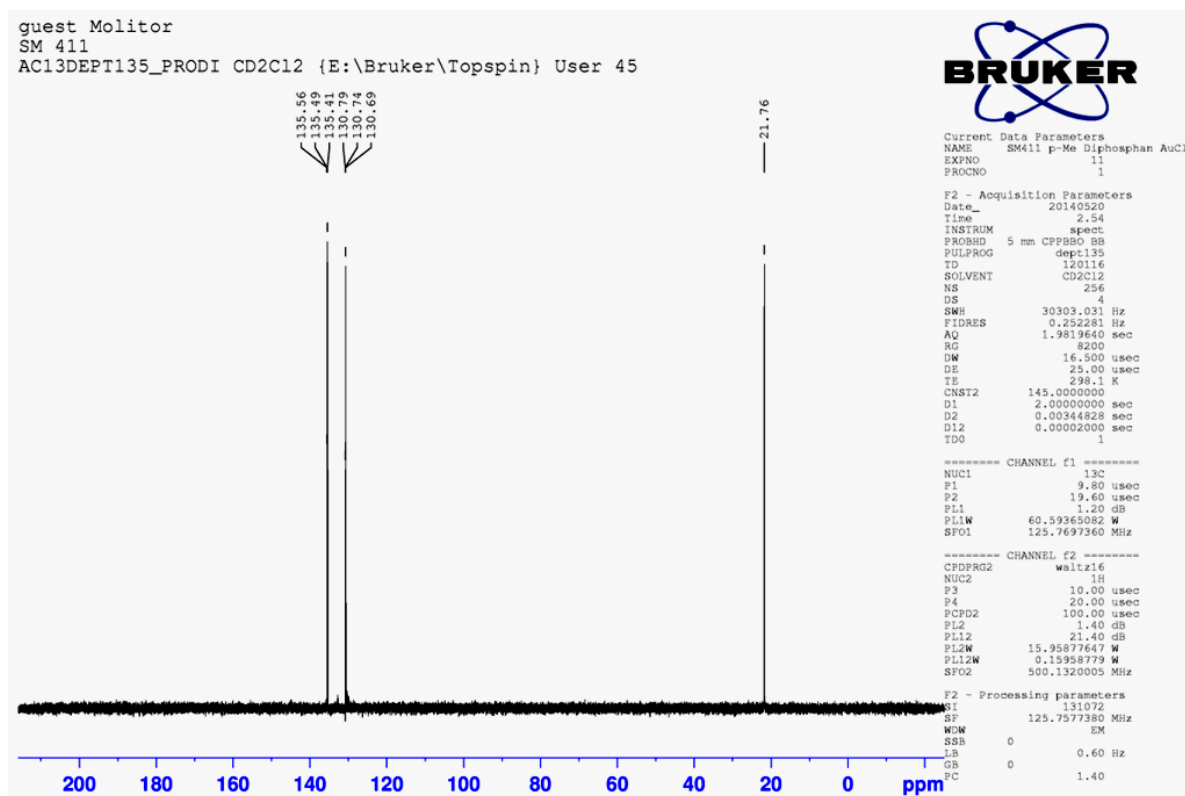

Figure S1b.  $^{13}\text{C}\{^1\text{H}\}$  NMR and  $^{13}\text{C}\{^1\text{H}\}$  DEPT135 NMR spectra of **2a**.

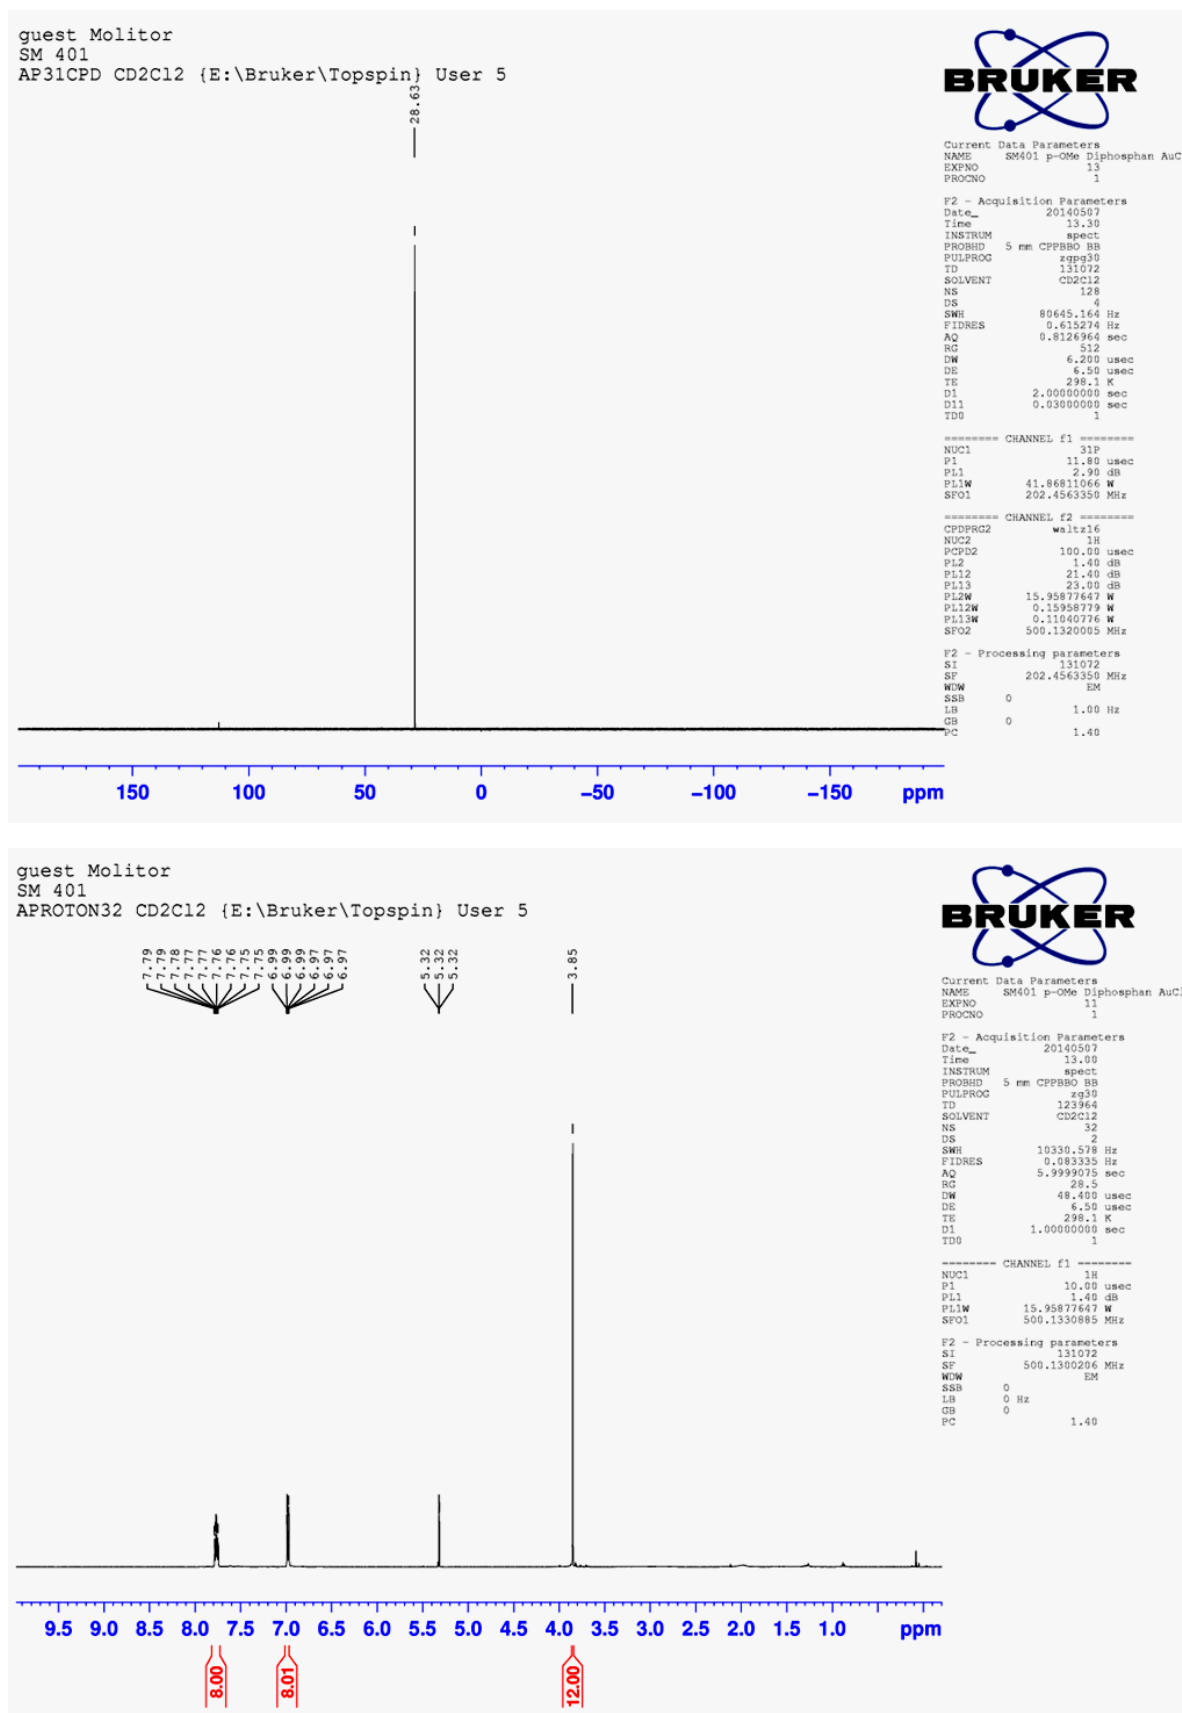

Figure S2a.  $^{31}\text{P}\{^1\text{H}\}$  NMR and  $^1\text{H}$  NMR spectra of **2b**.

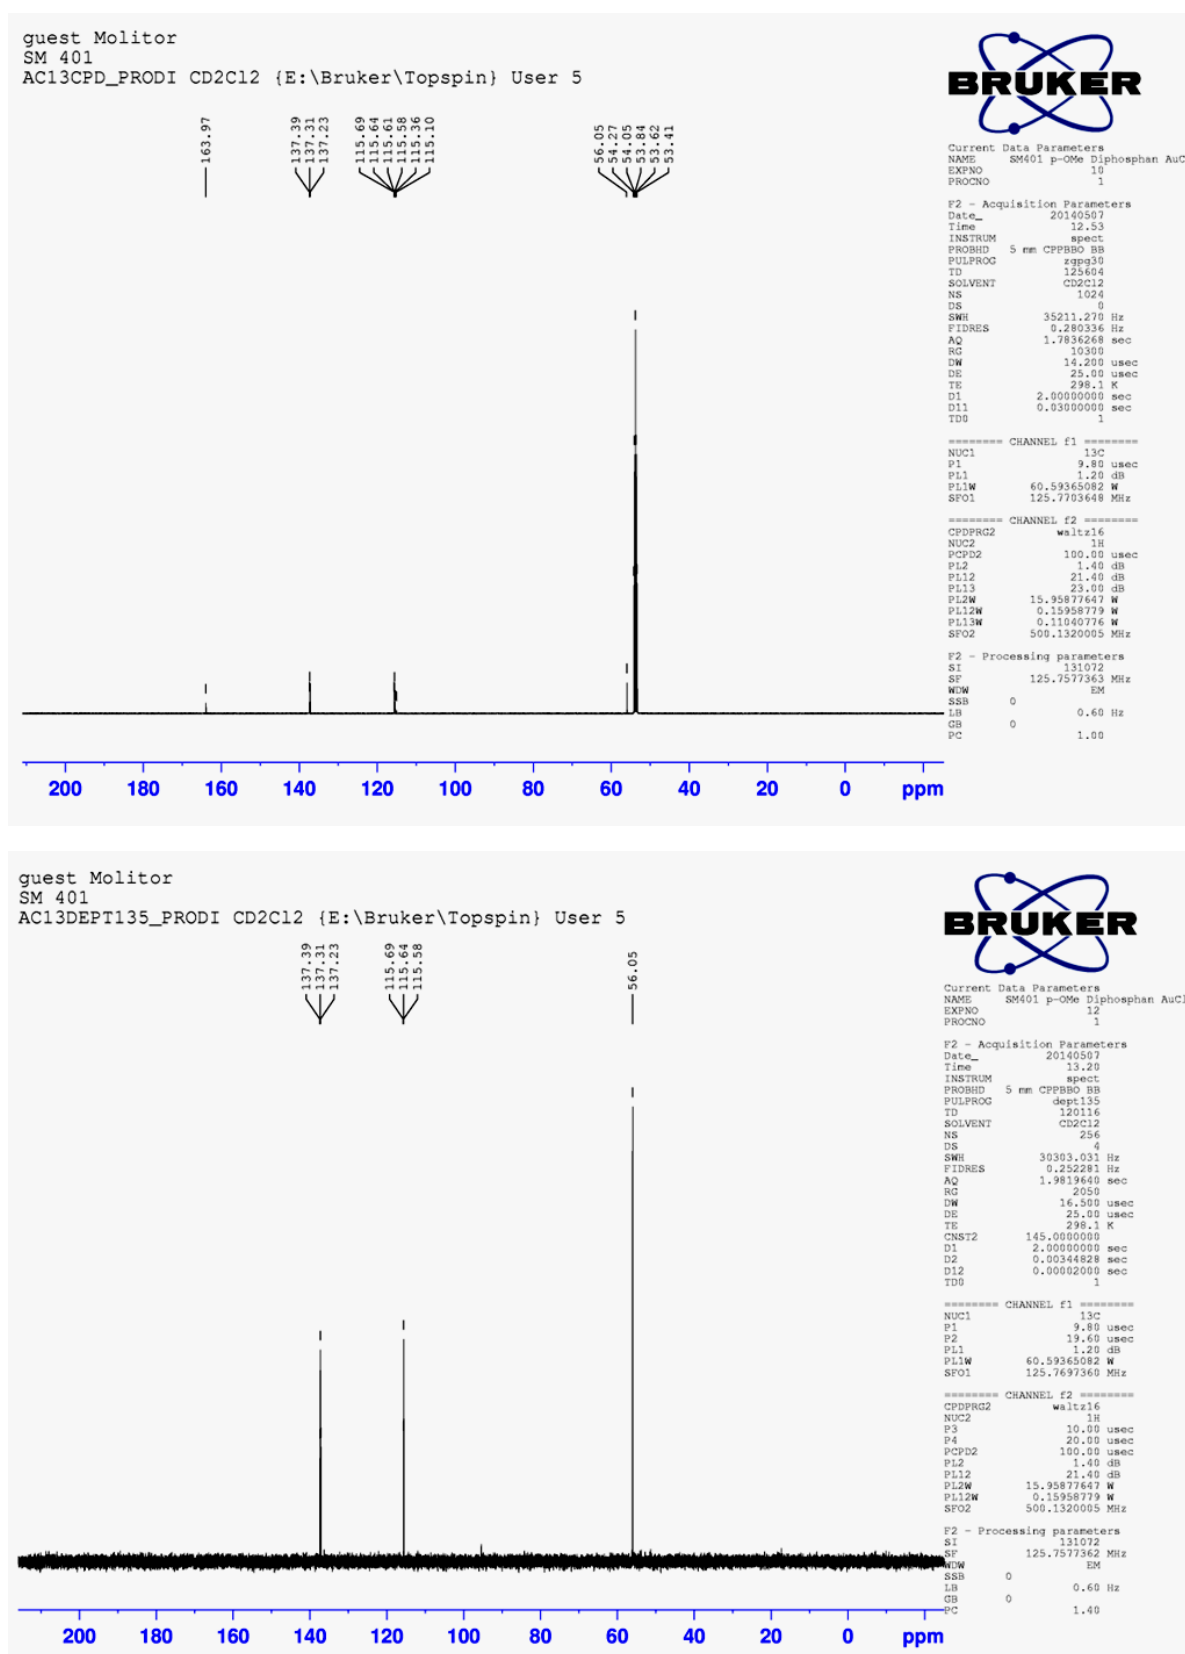

Figure S2b.  $^{13}\text{C}\{^1\text{H}\}$  NMR and  $^{13}\text{C}\{^1\text{H}\}$  DEPT135 NMR spectra of **2b**.

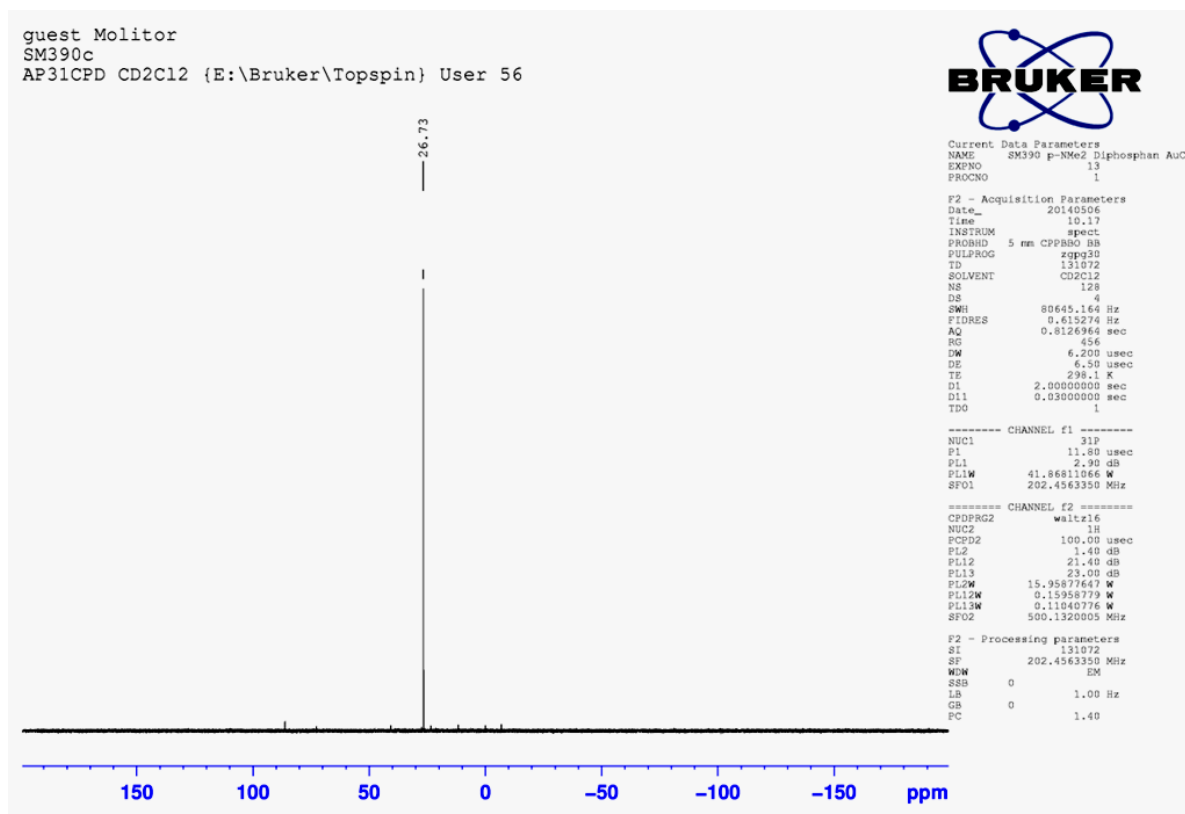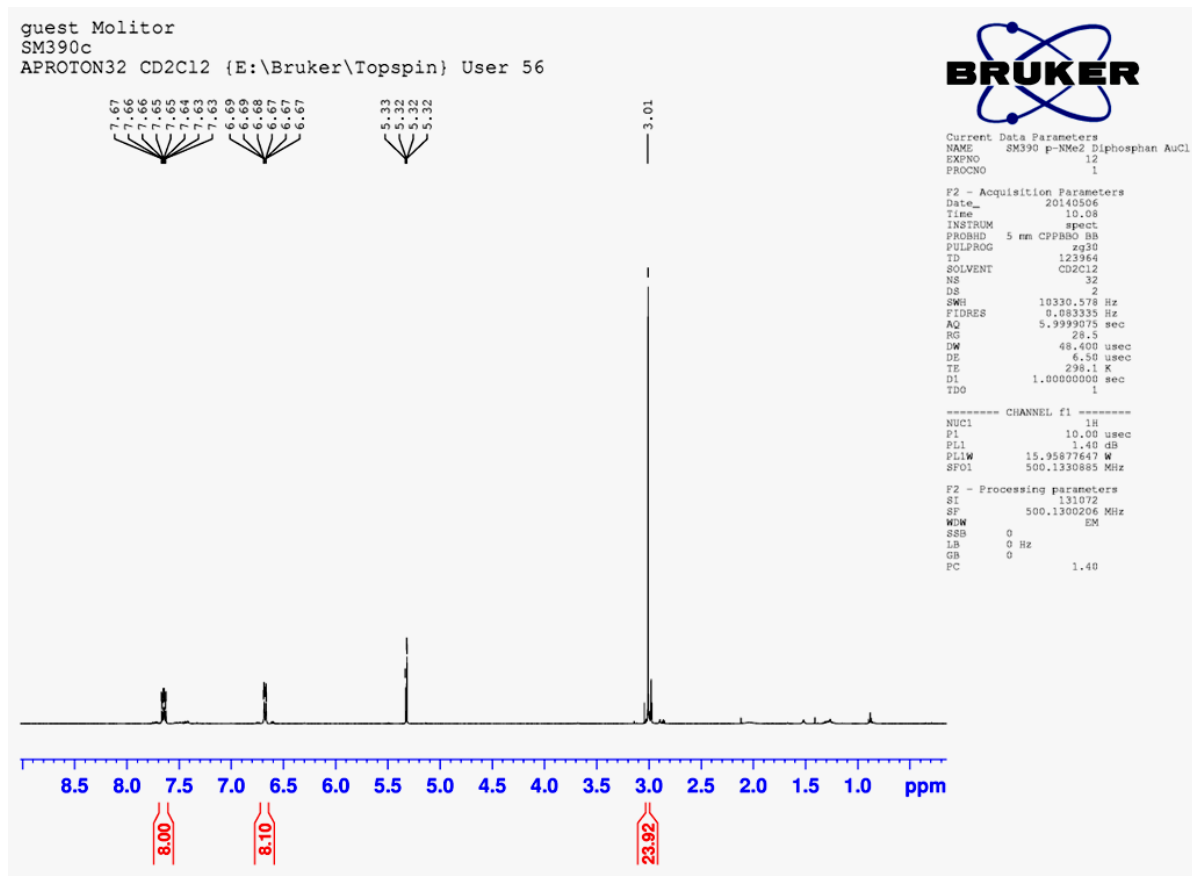

Figure S3a.  $^{31}\text{P}\{^1\text{H}\}$  NMR and  $^1\text{H}$  NMR spectra of **2c**.

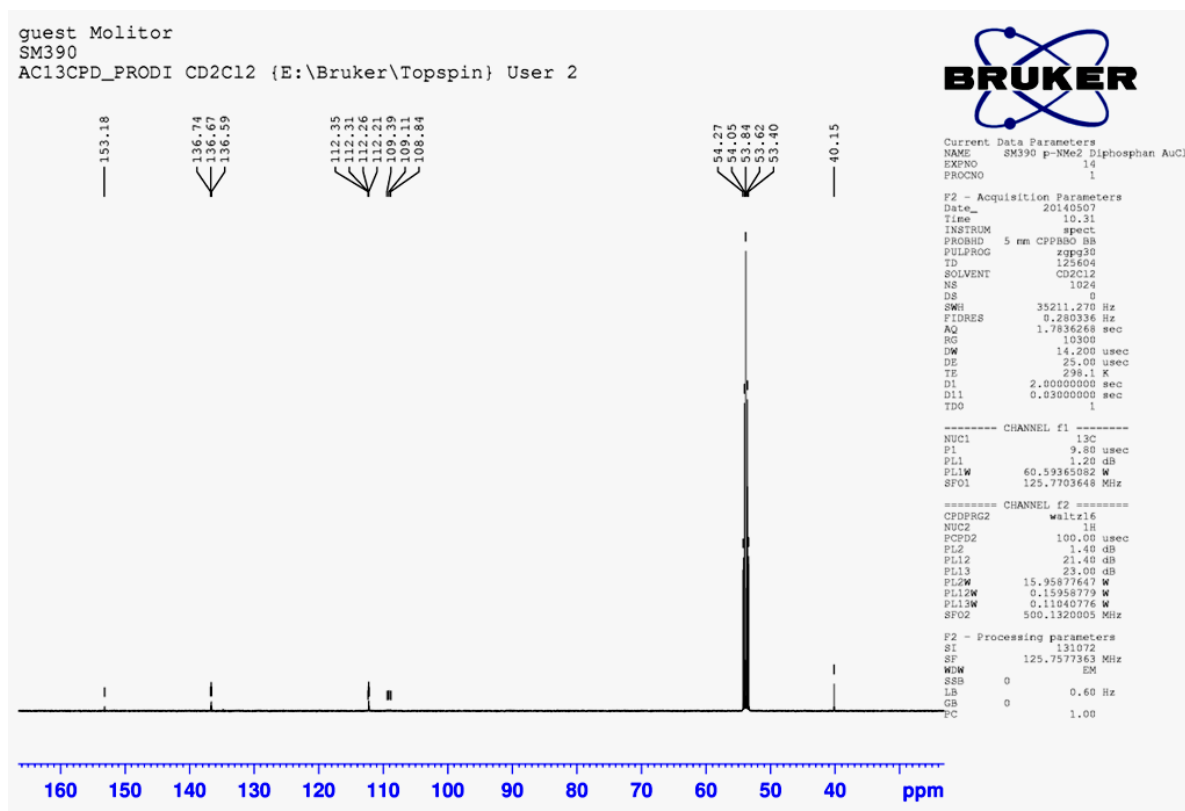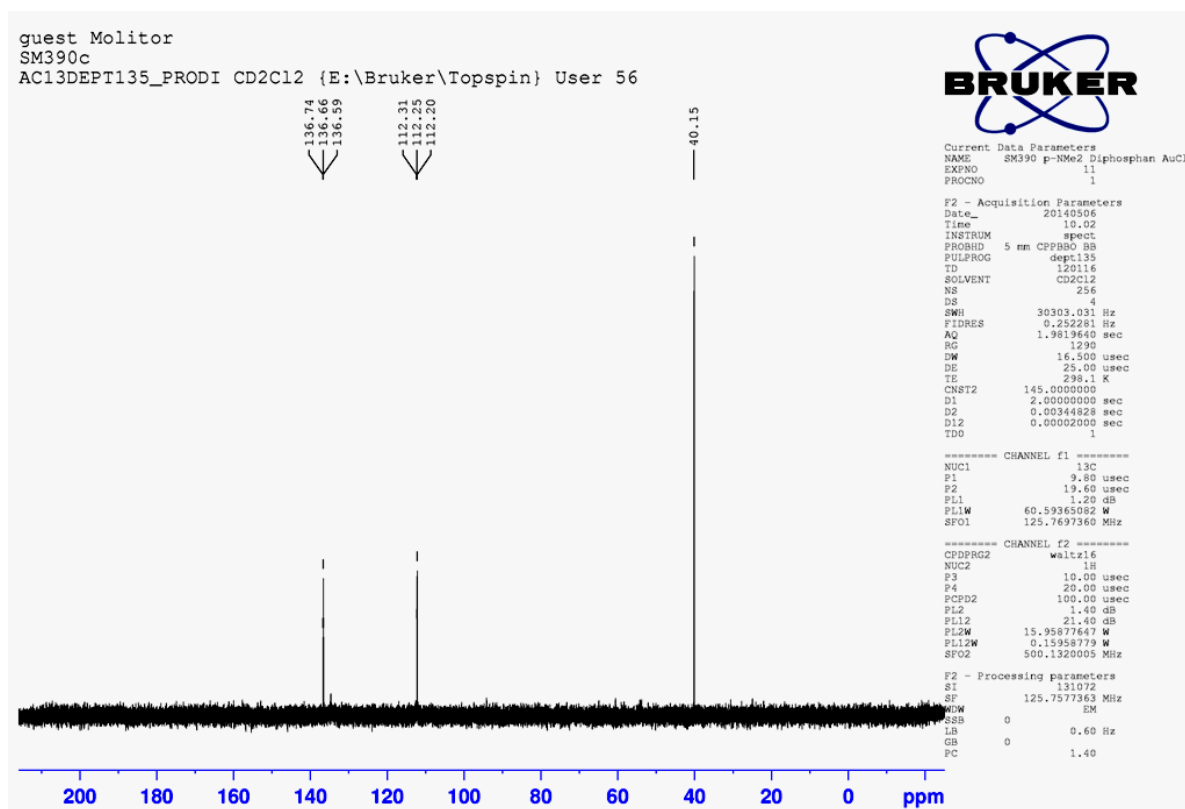

Figure S3b.  $^{13}\text{C}\{^1\text{H}\}$  NMR and  $^{13}\text{C}\{^1\text{H}\}$  DEPT135 NMR spectra of **2c**.

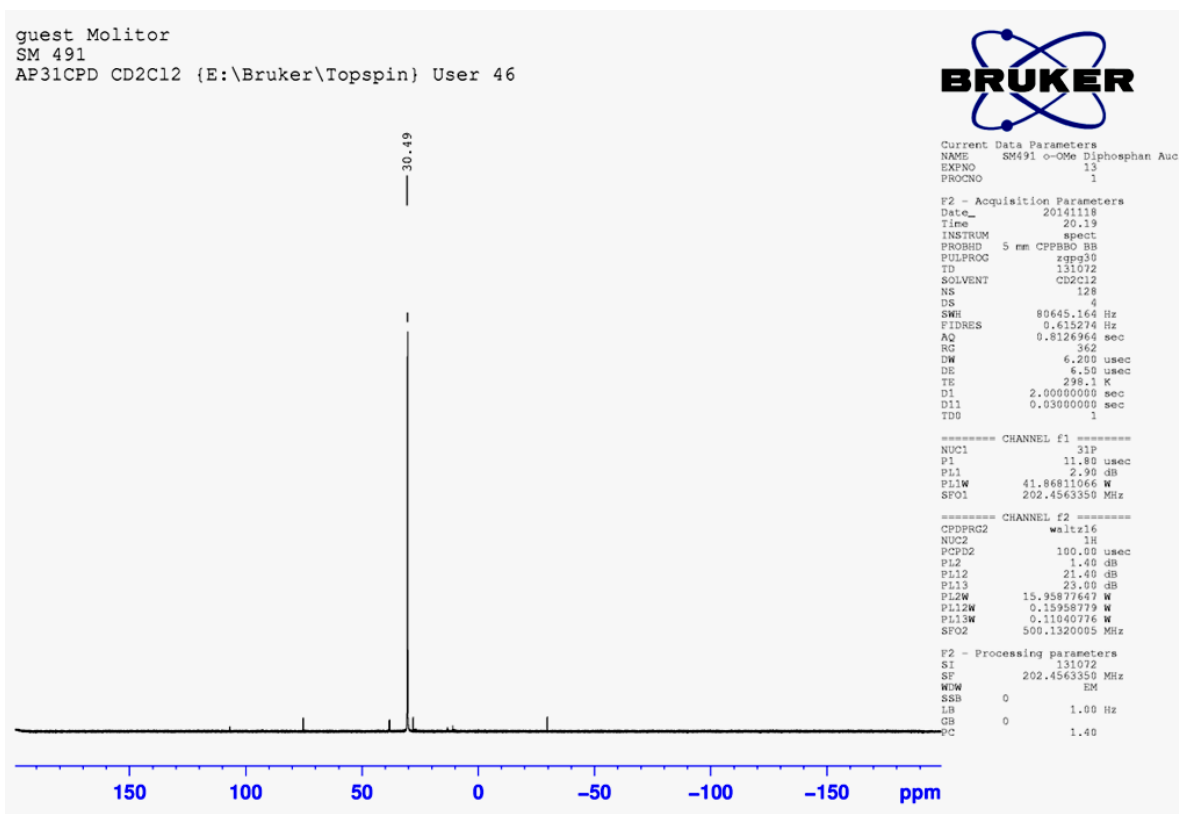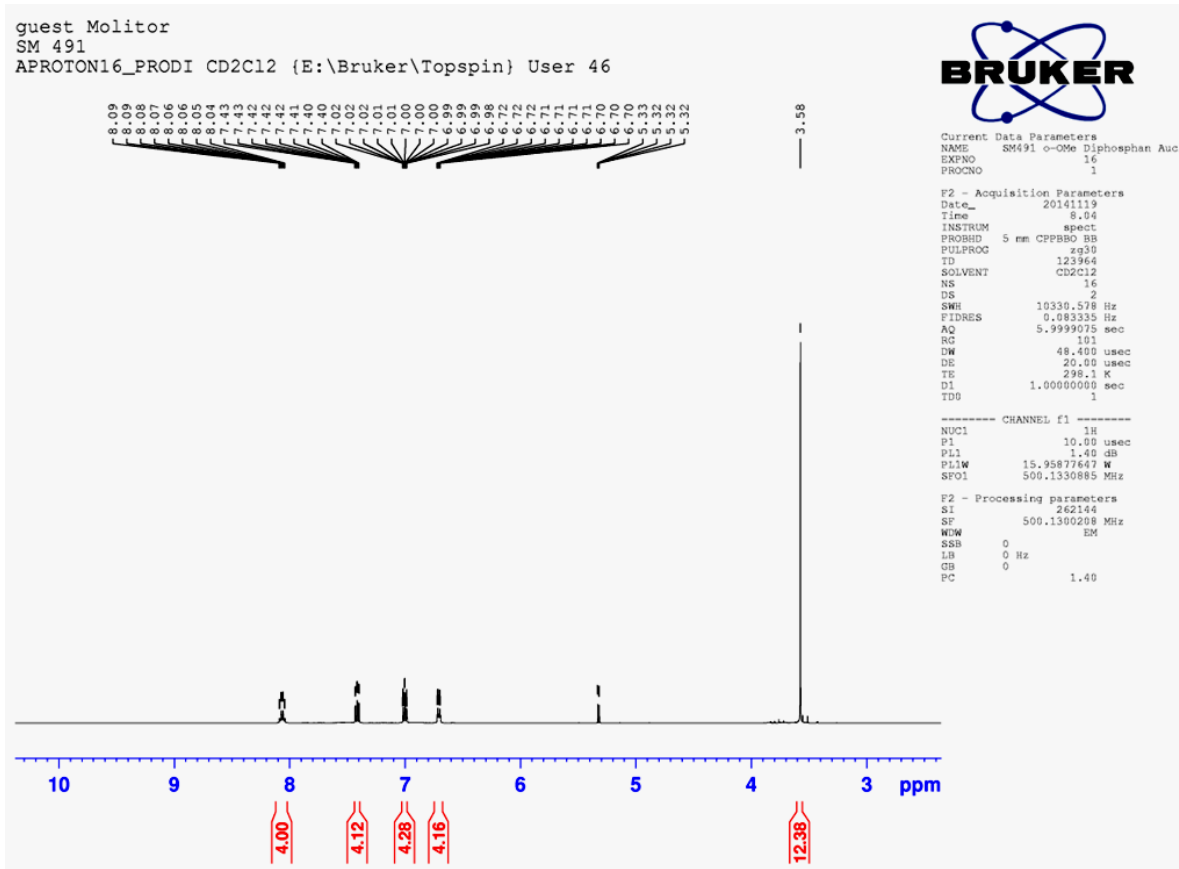

Figure S4a.  $^{31}\text{P}\{^1\text{H}\}$  NMR and  $^1\text{H}$  NMR spectra of **2d**.



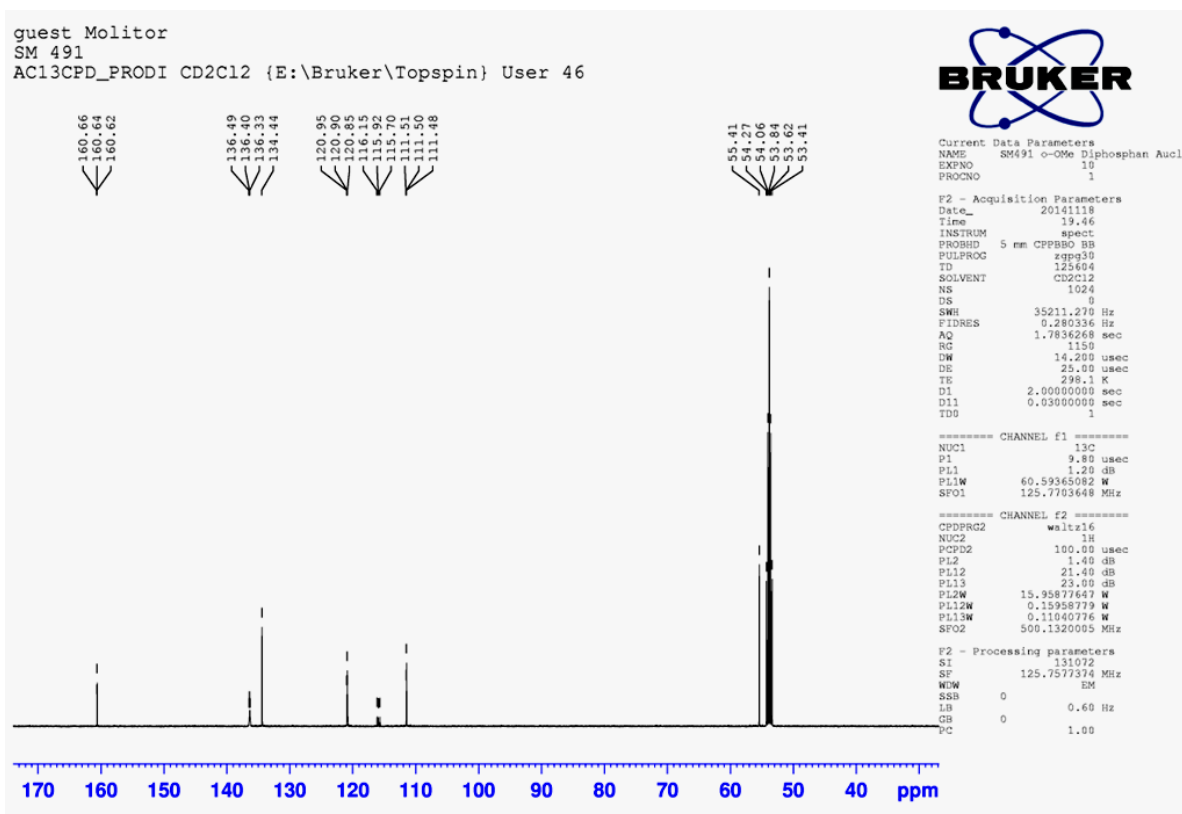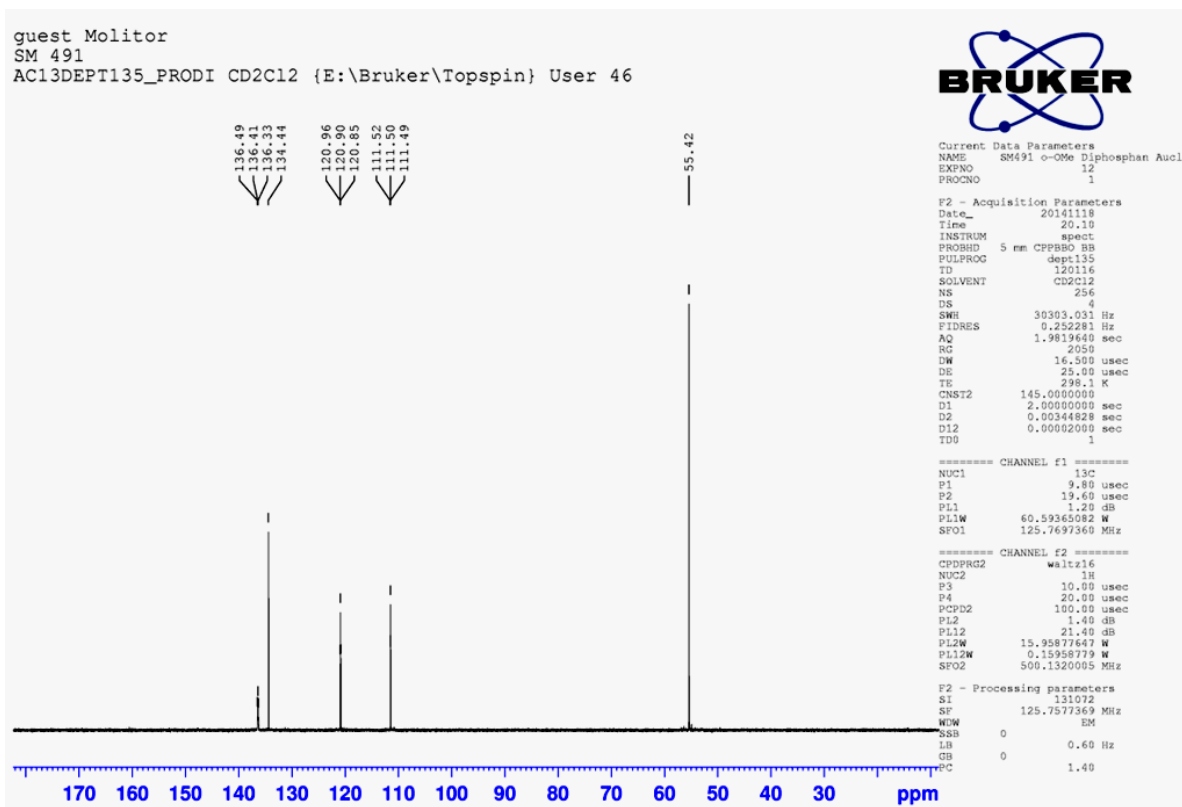

Figure S4b.  $^{13}\text{C}\{^1\text{H}\}$  NMR and  $^{13}\text{C}\{^1\text{H}\}$  DEPT135 NMR spectra of **2d**.

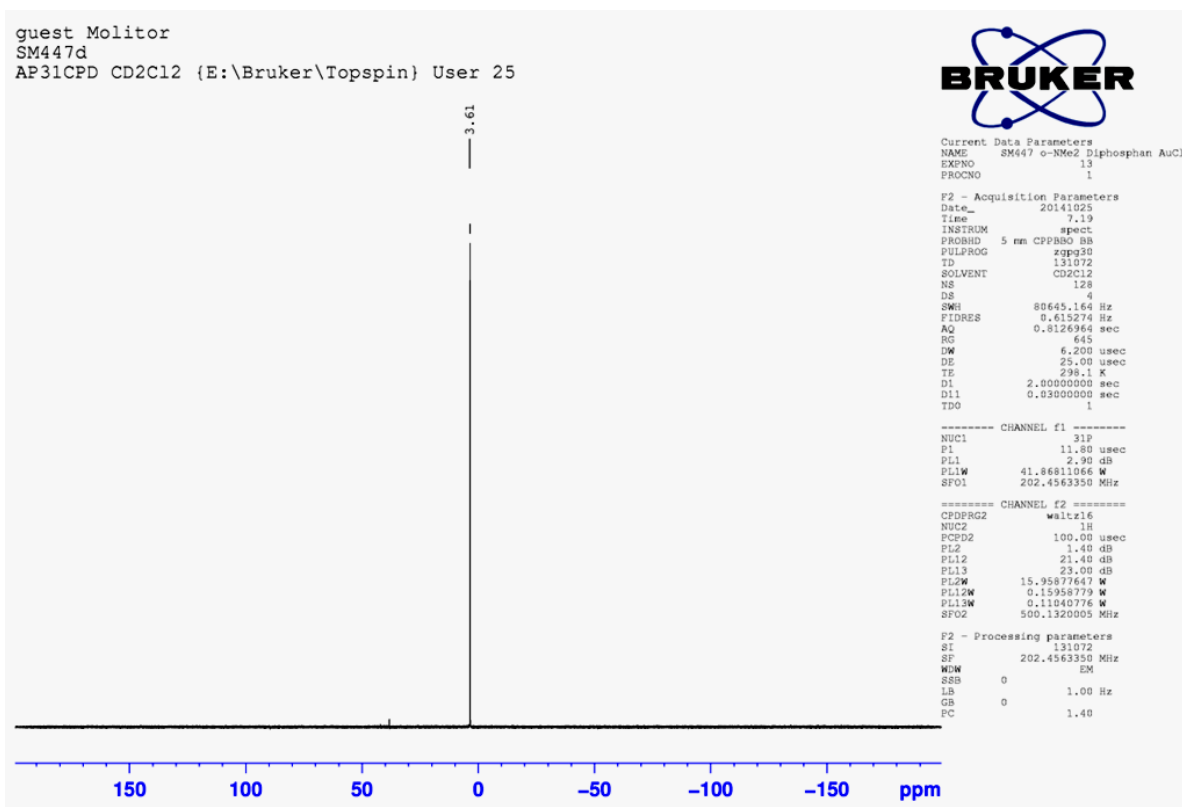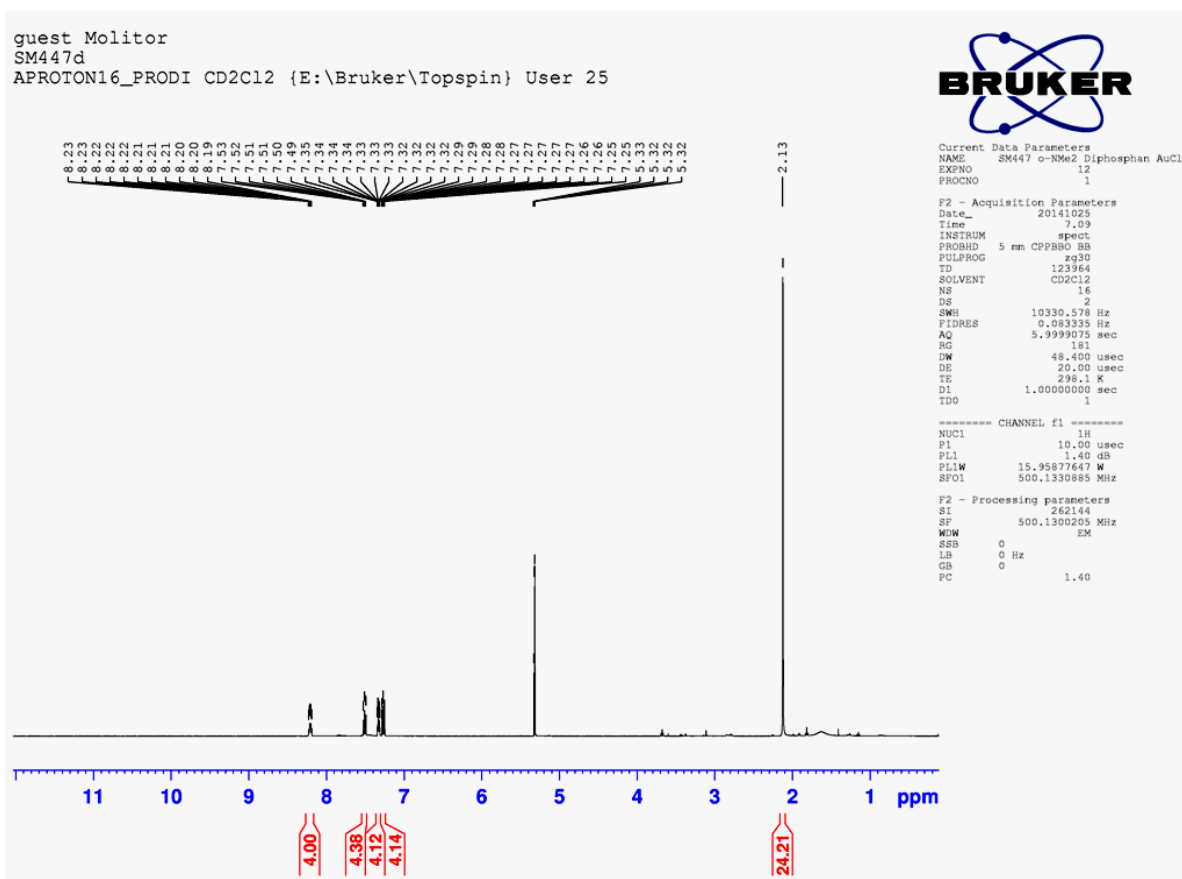

Figure S5a.  $^{31}\text{P}\{^1\text{H}\}$  NMR and  $^1\text{H}$  NMR spectra of **2e**.

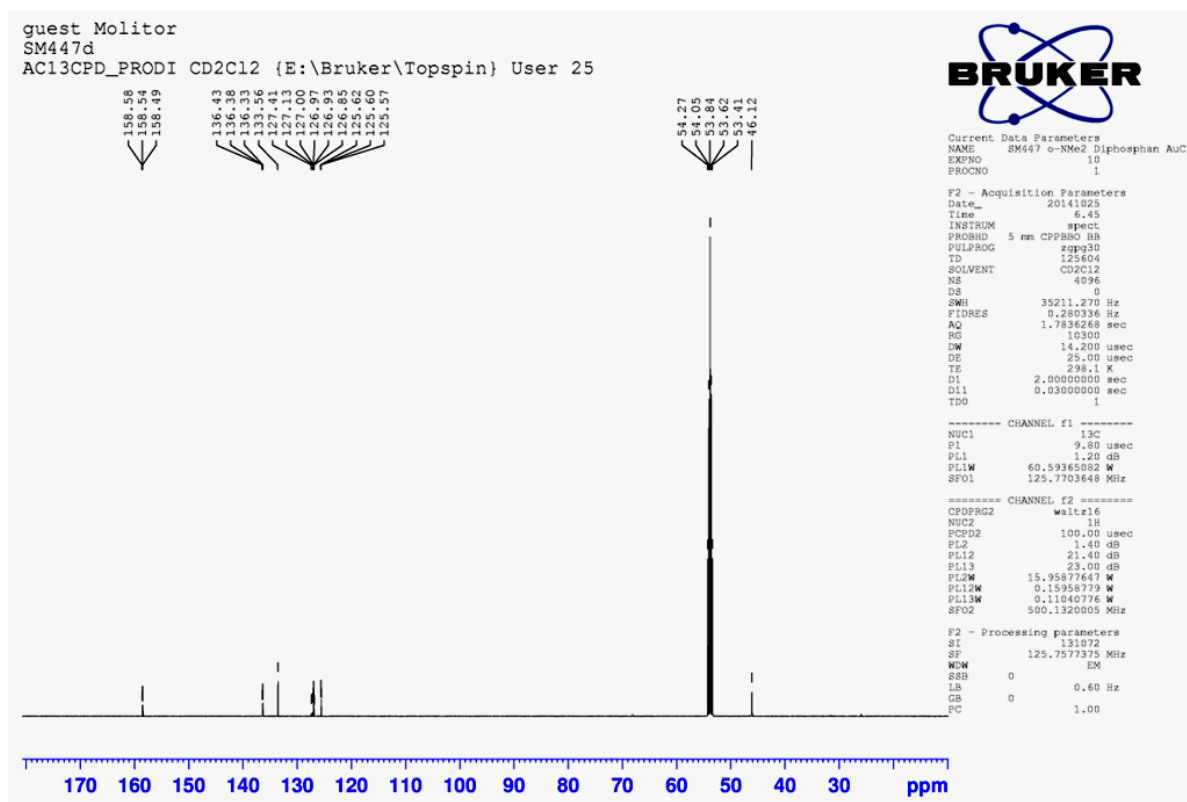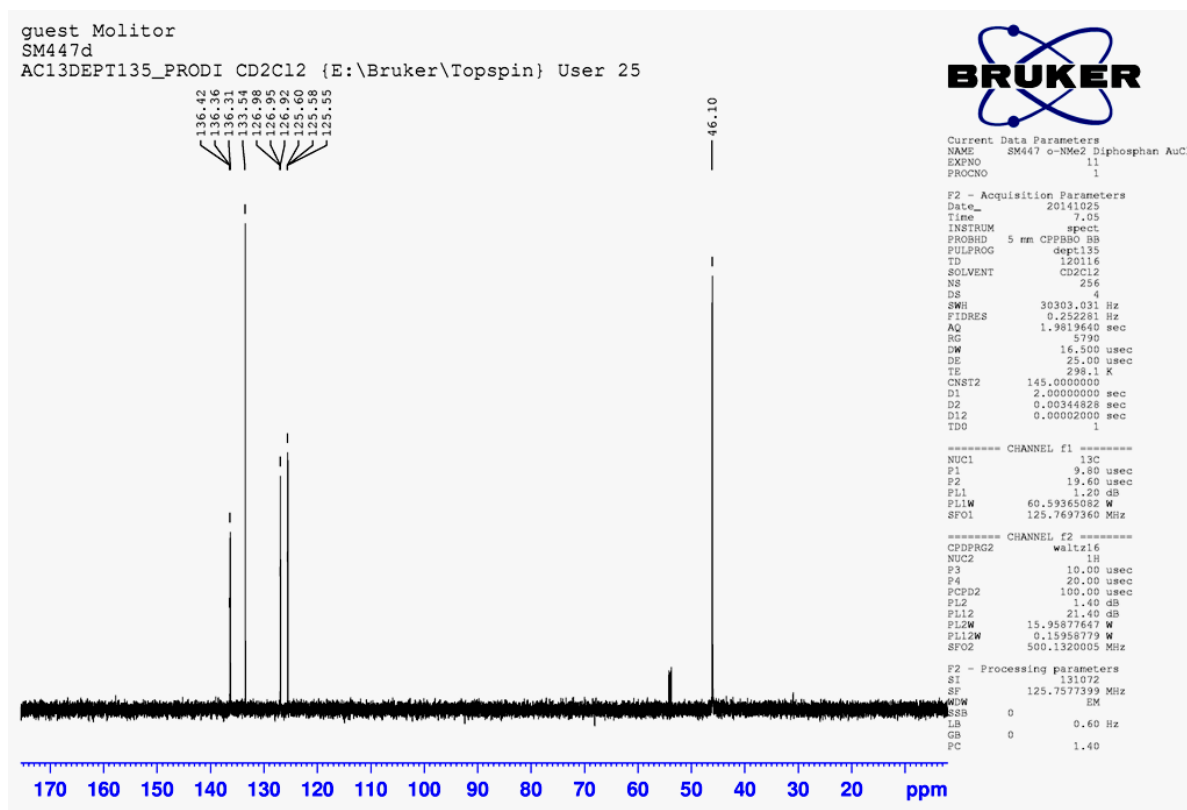

Figure S5b.  $^{13}\text{C}\{^1\text{H}\}$  NMR and  $^{13}\text{C}\{^1\text{H}\}$  DEPT135 NMR spectra of **2e**.

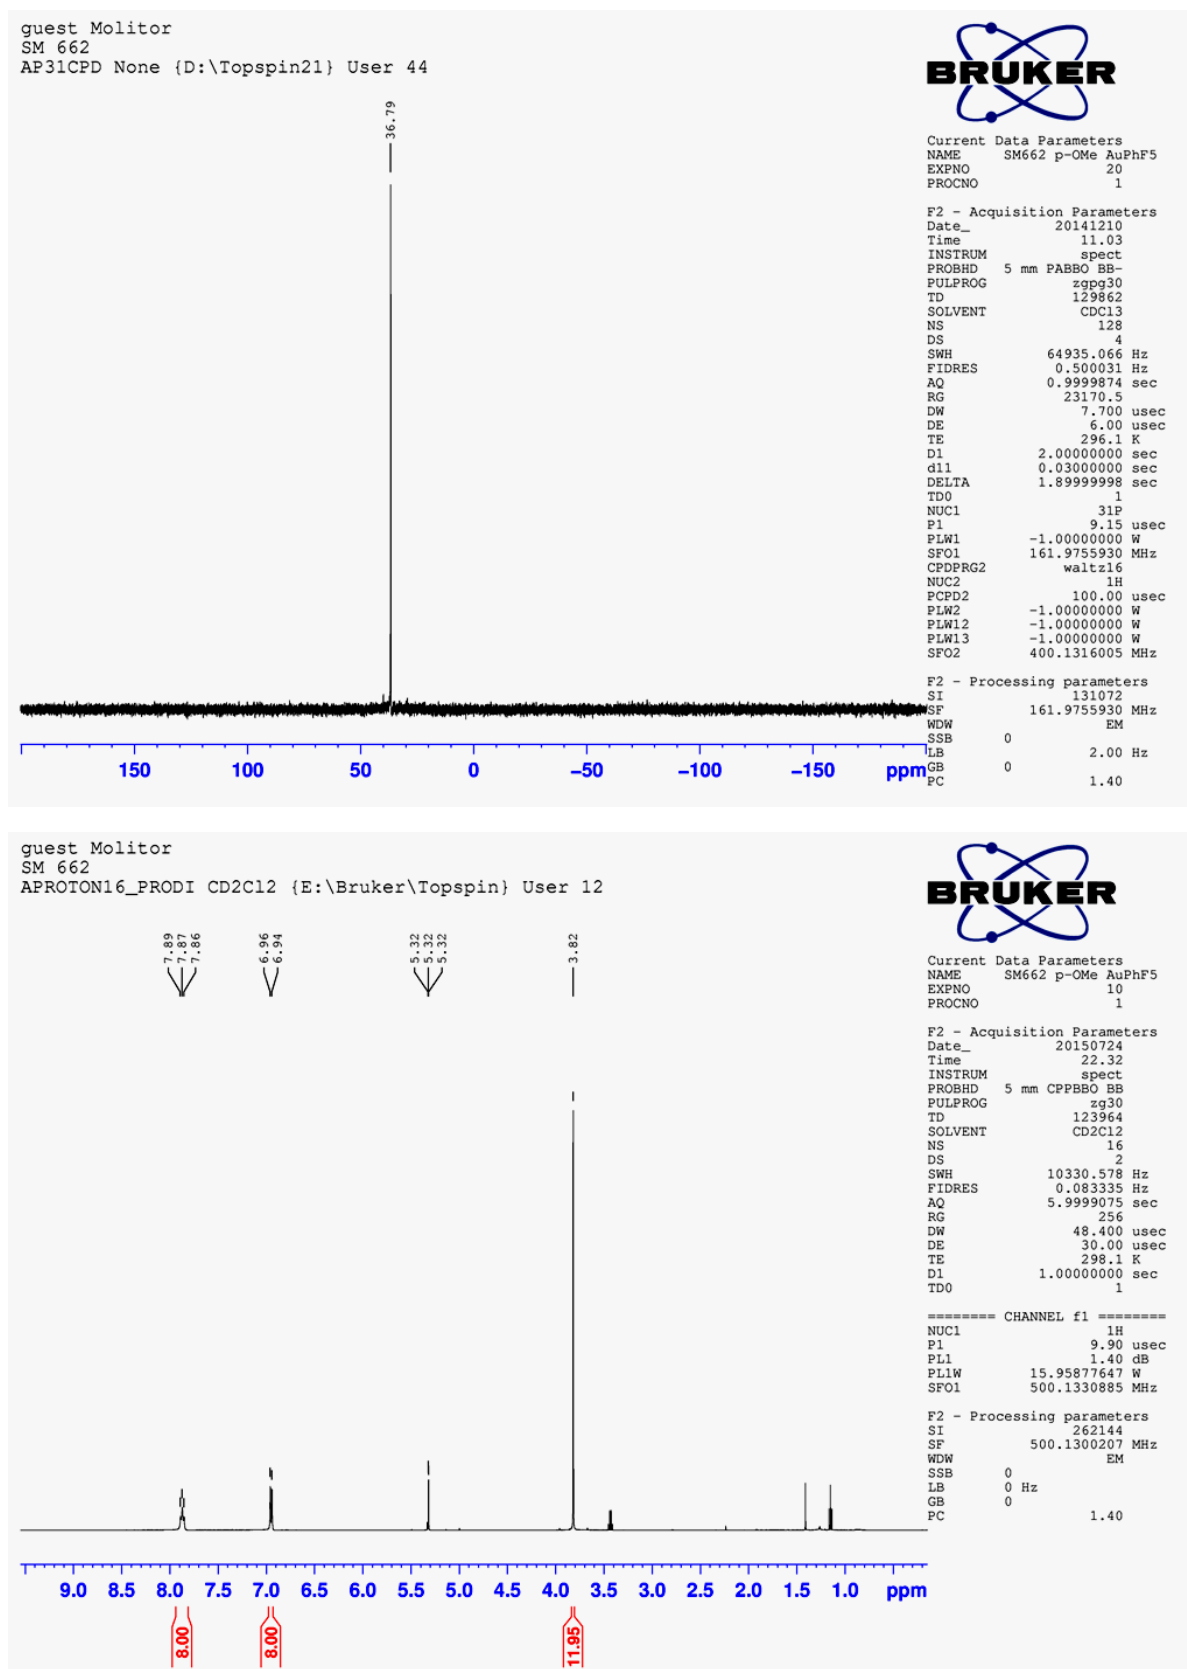

Figure S6a.  $^{31}\text{P}\{^1\text{H}\}$  NMR and  $^1\text{H}$  NMR spectra of **2h**.

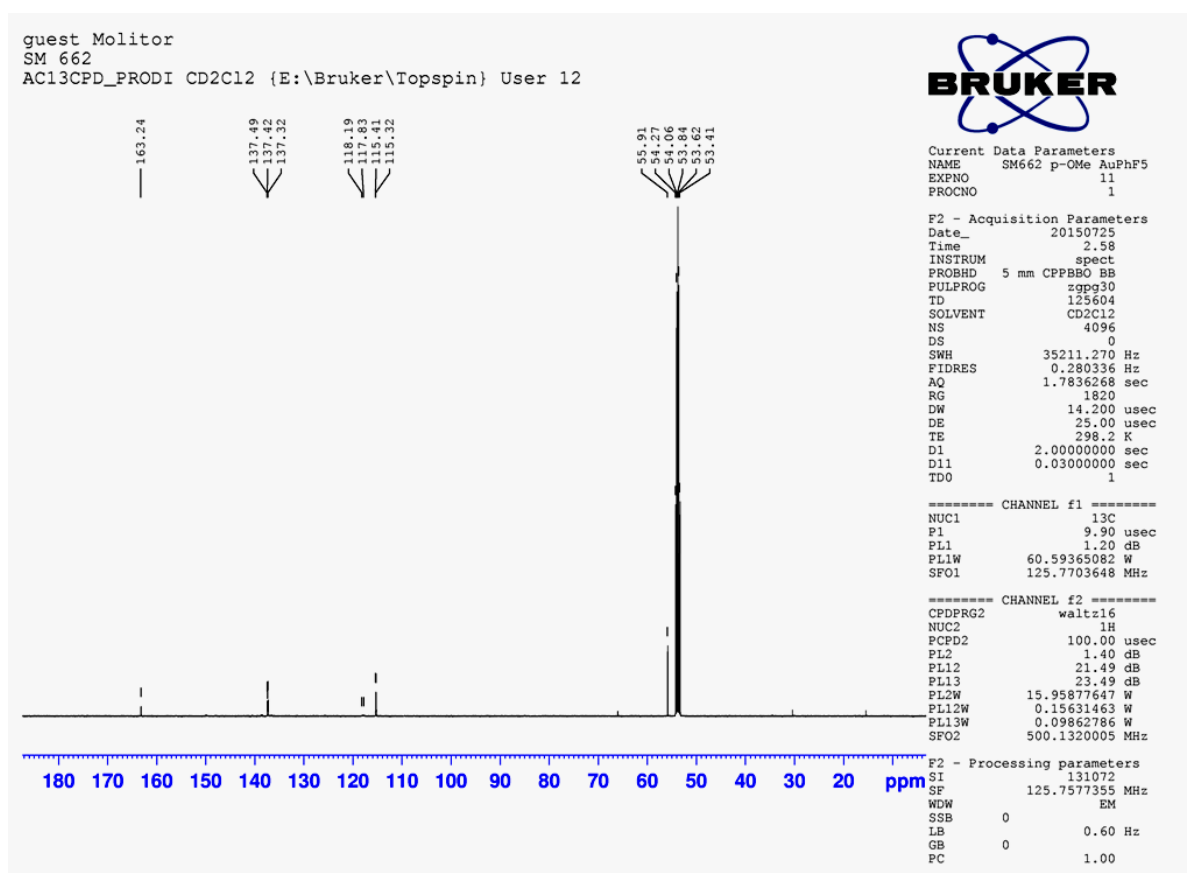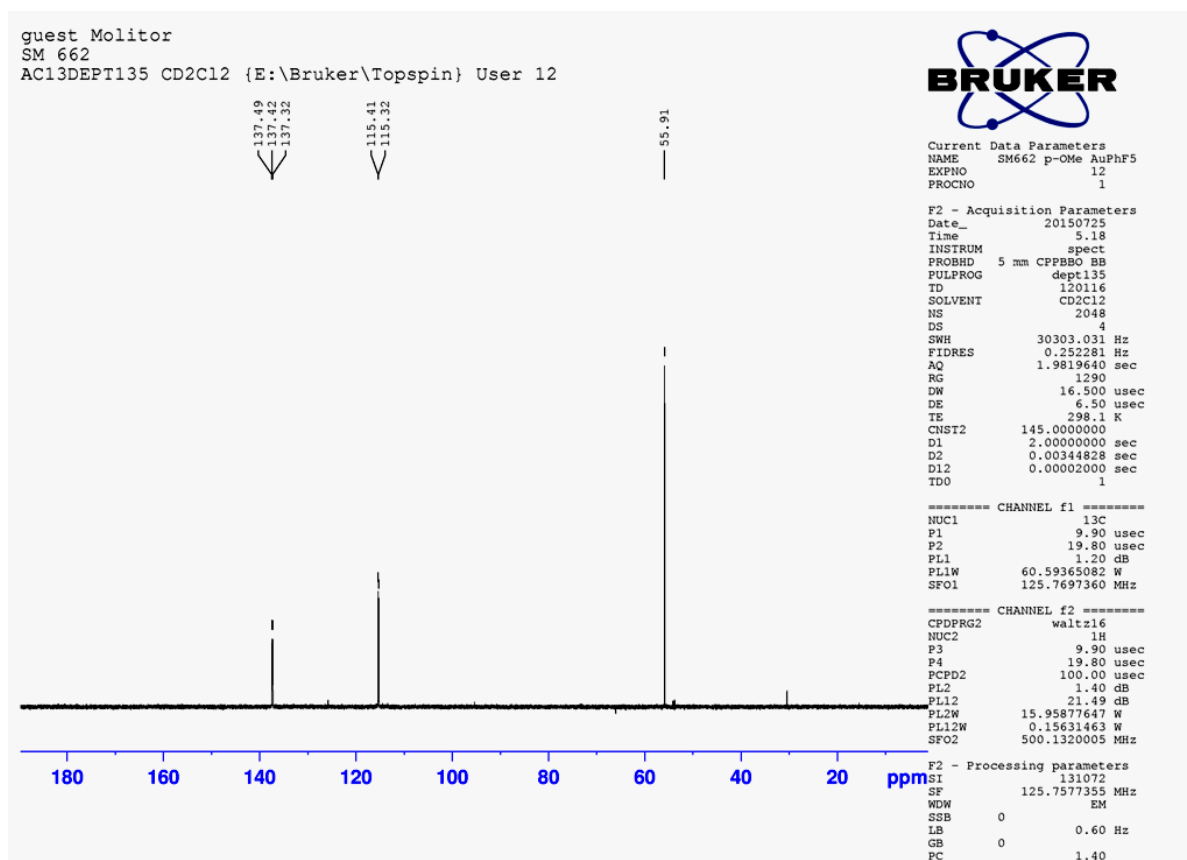

Figure S6b.  $^{13}\text{C}\{^1\text{H}\}$  NMR and  $^{13}\text{C}\{^1\text{H}\}$  DEPT135 NMR spectra of **2h**.

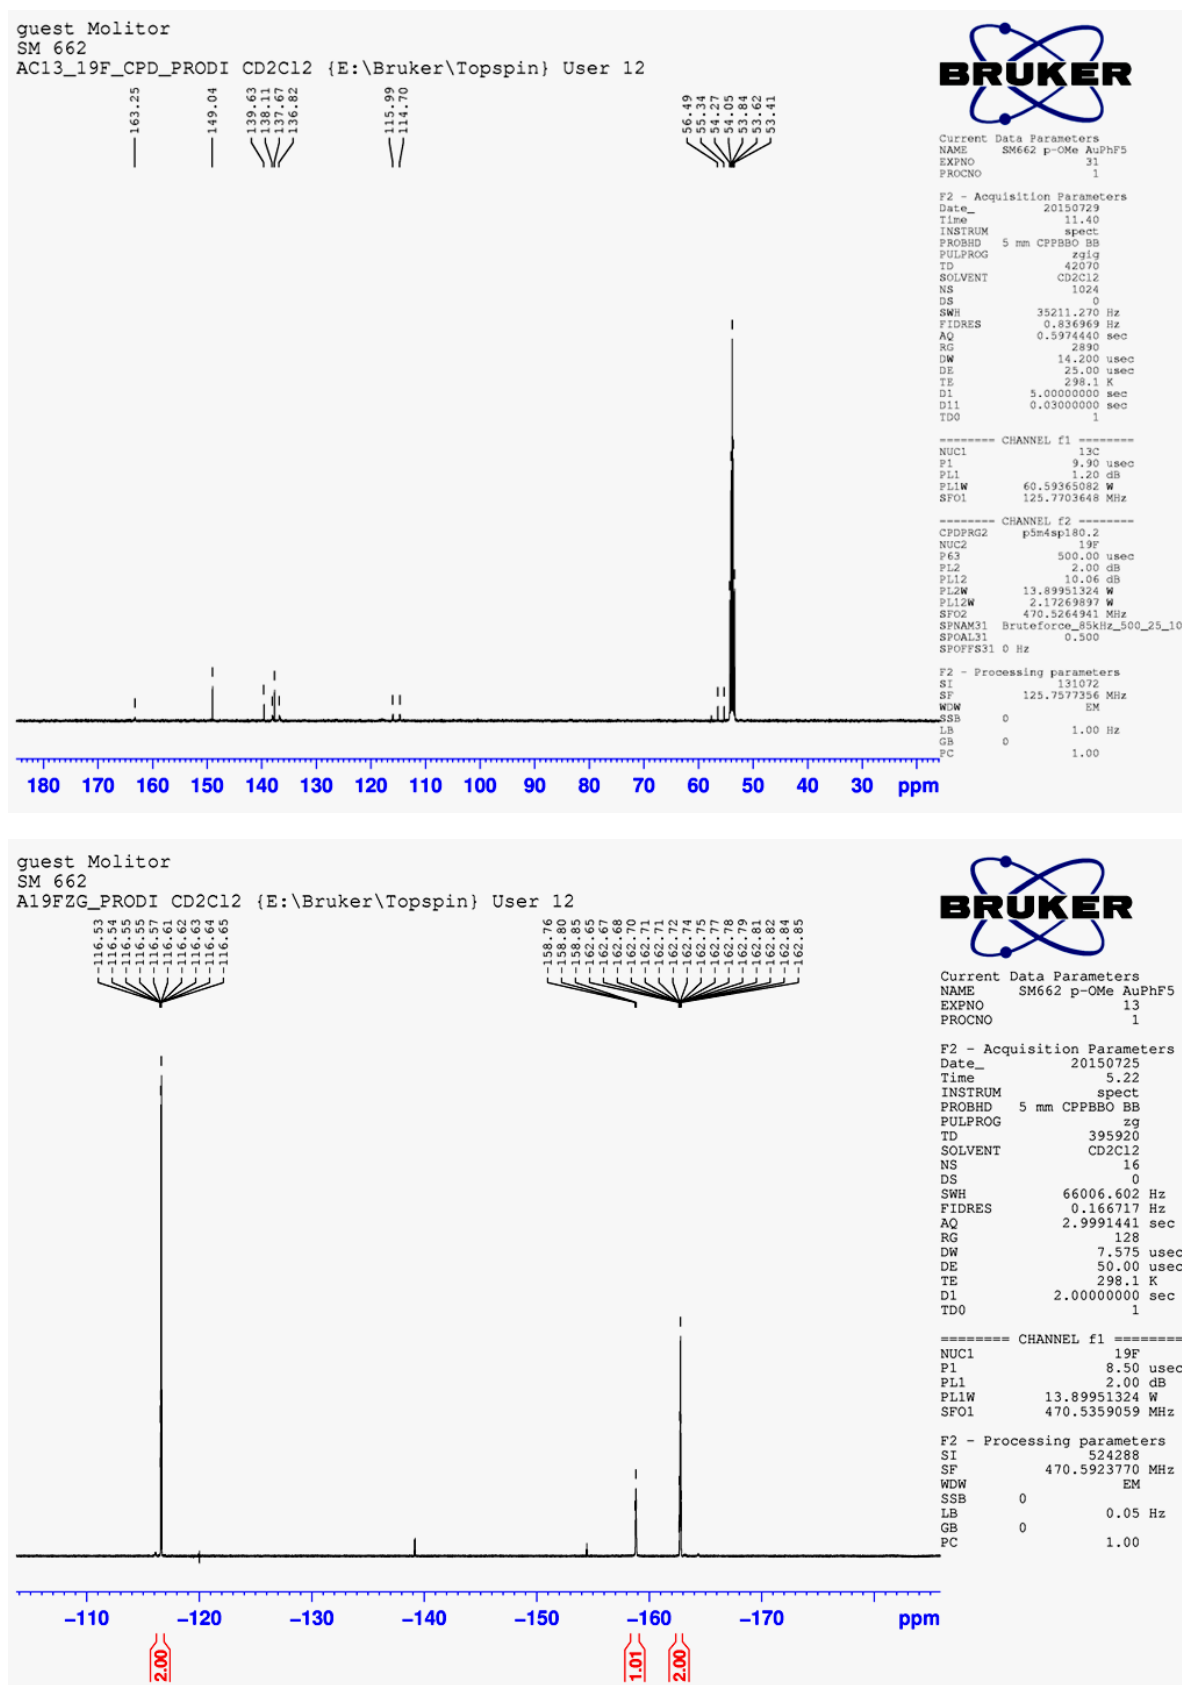

Figure S6c.  $^{13}\text{C}\{^{19}\text{F}\}$  NMR and  $^{19}\text{F}\{^1\text{H}\}$  NMR spectra of **2h**.

## 2. Crystal Structure Determination

Data collection of all compounds was conducted with a Bruker APEX2-CCD (D8 three-circle goniometer). The structures were solved using direct methods, refined with the Shelx software package<sup>[1]</sup> and expanded using Fourier techniques. The crystals of all compounds were mounted in an inert oil (perfluoropolyalkylether). Crystal structure determinations were effected at 100 K. Crystallographic data (excluding structure factors) have been deposited with the Cambridge Crystallographic Data Centre as supplementary publication no. CCDC-1463741-1463748. Copies of the data can be obtained free of charge on application to Cambridge Crystallographic Data Centre, 12 Union Road, Cambridge CB2 1EZ, UK; [fax: (+44) 1223-336-033; email: deposit@ccdc.cam.ac.uk].

**Table S1.** Data collection and structure refinement details for compounds **2a-2c**.

| Compound                              | <b>1d</b>                                                     | <b>1f</b>                                      |
|---------------------------------------|---------------------------------------------------------------|------------------------------------------------|
| CCDC No.                              | CCDC-1463741                                                  | CCDC-1463742                                   |
| Formula                               | C <sub>28</sub> H <sub>28</sub> O <sub>4</sub> P <sub>2</sub> | C <sub>28</sub> H <sub>28</sub> P <sub>2</sub> |
| Formula weight [g·mol <sup>-1</sup> ] | 490.44                                                        | 426.44                                         |
| Temperature [K]                       | 100(2)                                                        | 100(2)                                         |
| Wave length [Å]                       | 0.71073                                                       | 0.71073                                        |
| Crystal system                        | monoclinic                                                    | monoclinic                                     |
| Space group                           | C2/c (15)                                                     | P2 <sub>1</sub> /c (14)                        |
| a [Å]                                 | 14.3337(13)                                                   | 7.5386(3)                                      |
| b [Å]                                 | 8.0972(7)                                                     | 16.2636(7)                                     |
| c [Å]                                 | 21.2171(19)                                                   | 18.9268(8)                                     |
| β [°]                                 | 91.838(3)                                                     | 100.154(1)                                     |
| Volume [Å <sup>3</sup> ]              | 2461.2(4)                                                     | 2284.17(17)                                    |
| Z                                     | 4                                                             | 4                                              |
| Calc. density [Mg·m <sup>-3</sup> ]   | 1.324                                                         | 1.240                                          |
| μ (MoKα) [mm <sup>-1</sup> ]          | 0.210                                                         | 0.203                                          |
| F(000)                                | 1032                                                          | 904                                            |
| Crystal dimensions [mm]               | 0.26 x 0.16 x 0.04                                            | 0.26 x 0.21 x 0.13                             |
| Theta range [°]                       | 2.89 to 26.42                                                 | 1.66 to 26.44                                  |
| Index ranges                          | -17 ≤ k ≤ 17<br>-10 ≤ l ≤ 10<br>-26 ≤ m ≤ 26                  | -9 ≤ h ≤ 9<br>-20 ≤ k ≤ 20<br>-23 ≤ l ≤ 23     |
| Reflections collected                 | 15540                                                         | 30184                                          |
| Independent reflections               | 2523 [ <i>R</i> <sub>int</sub> = 0.0578]                      | 4701 [ <i>R</i> <sub>int</sub> = 0.0403]       |
| Data/Restraints/Parameter             | 2523 / 0 / 146                                                | 4701 / 0 / 275                                 |
| Goodness-of-fit on F <sup>2</sup>     | 1.035                                                         | 1.010                                          |
| Final R indices [I > 2σ(I)]           | R1 = 0.0431<br>wR2 = 0.01095                                  | R1 = 0.0326<br>wR2 = 0.0789                    |
| R indices (all data)                  | R1 = 0.0545<br>wR2 = 0.1157                                   | R1 = 0.0431<br>wR2 = 0.0871                    |
| Largest diff. peak and hole           | 0.476 and -0.335                                              | 0.307 and -0.237                               |

**Table S2.** Data collection and structure refinement details for compounds **2a-2c**.

| Compound                              | <b>2a</b>                                                                      | <b>2b</b>                                                                                     | <b>2c</b>                                                                                     |
|---------------------------------------|--------------------------------------------------------------------------------|-----------------------------------------------------------------------------------------------|-----------------------------------------------------------------------------------------------|
| CCDC No.                              | CCDC-1463743                                                                   | CCDC-1463744                                                                                  | CCDC-1463745                                                                                  |
| Formula                               | C <sub>28</sub> H <sub>28</sub> Au <sub>2</sub> Cl <sub>2</sub> P <sub>2</sub> | C <sub>28</sub> H <sub>28</sub> Au <sub>2</sub> Cl <sub>2</sub> O <sub>4</sub> P <sub>2</sub> | C <sub>34</sub> H <sub>44</sub> Au <sub>2</sub> Cl <sub>6</sub> N <sub>4</sub> P <sub>2</sub> |
| Formula weight [g·mol <sup>-1</sup> ] | 891.28                                                                         | 955.28                                                                                        | 1177.31                                                                                       |
| Temperature [K]                       | 100(2)                                                                         | 100(2)                                                                                        | 100(2)                                                                                        |
| Wave length [Å]                       | 0.71073                                                                        | 0.71073                                                                                       | 0.71073                                                                                       |
| Crystal system                        | orthorhombic                                                                   | monoclinic                                                                                    | triclinic                                                                                     |
| Space group                           | <i>Pca</i> 2 <sub>1</sub> (29)                                                 | <i>C</i> 2/ <i>c</i> (15)                                                                     | <i>P</i> -1 (2)                                                                               |
| a [Å]                                 | 11.5429(8)                                                                     | 15.401(2)                                                                                     | 10.3579(9)                                                                                    |
| b [Å]                                 | 16.0408(11)                                                                    | 12.9857(19)                                                                                   | 10.4563(7)                                                                                    |
| c [Å]                                 | 14.5815(11)                                                                    | 14.468(3)                                                                                     | 11.1637(7)                                                                                    |
| α [°]                                 |                                                                                |                                                                                               | 62.997(2)                                                                                     |
| β [°]                                 |                                                                                | 100.885(6)                                                                                    | 68.316(2)                                                                                     |
| γ [°]                                 |                                                                                |                                                                                               | 78.142(2)                                                                                     |
| Volume [Å <sup>3</sup> ]              | 2699.8(3)                                                                      | 2841.4(8)                                                                                     | 1000.00(11)                                                                                   |
| Z                                     | 4                                                                              | 4                                                                                             | 1                                                                                             |
| Calc. density [Mg·m <sup>-3</sup> ]   | 2.193                                                                          | 2.233                                                                                         | 1.955                                                                                         |
| μ (MoKα) [mm <sup>-1</sup> ]          | 11.188                                                                         | 10.649                                                                                        | 7.838                                                                                         |
| F(000)                                | 1672                                                                           | 1800                                                                                          | 566                                                                                           |
| Crystal dimensions [mm]               | 0.34 x 0.22 x 0.17                                                             | 0.16 x 0.12 x 0.08                                                                            | 0.19 x 0.15 x 0.03                                                                            |
| Theta range [°]                       | 1.27 to 24.99                                                                  | 3.32 to 25.00                                                                                 | 3.65 to 25.00                                                                                 |
| Index ranges                          | -13 ≤ k ≤ 13<br>-19 ≤ l ≤ 19<br>-17 ≤ m ≤ 17                                   | -18 ≤ h ≤ 16<br>-15 ≤ k ≤ 15<br>-17 ≤ l ≤ 17                                                  | -12 ≤ h ≤ 12<br>-11 ≤ k ≤ 12<br>-13 ≤ l ≤ 11                                                  |
| Reflections collected                 | 31069                                                                          | 11261                                                                                         | 8676                                                                                          |
| Independent reflections               | 4745 [ <i>R</i> <sub>int</sub> = 0.0553]                                       | 2502 [ <i>R</i> <sub>int</sub> = 0.0403]                                                      | 3508 [ <i>R</i> <sub>int</sub> = 0.0352]                                                      |
| Data/Restraints/Parameter             | 4745 / 1 / 251                                                                 | 2502 / 0 / 174                                                                                | 3508 / 0 / 221                                                                                |
| Goodness-of-fit on F <sup>2</sup>     | 1.066                                                                          | 1.031                                                                                         | 1.033                                                                                         |
| Final R indices [I > 2σ(I)]           | <i>R</i> 1 = 0.0234<br>w <i>R</i> 2 = 0.0459                                   | <i>R</i> 1 = 0.0209<br>w <i>R</i> 2 = 0.0386                                                  | <i>R</i> 1 = 0.0273<br>w <i>R</i> 2 = 0.0518                                                  |
| R indices (all data)                  | <i>R</i> 1 = 0.0322<br>w <i>R</i> 2 = 0.0490                                   | <i>R</i> 1 = 0.0285<br>w <i>R</i> 2 = 0.0412                                                  | <i>R</i> 1 = 0.0351<br>w <i>R</i> 2 = 0.0548                                                  |
| Largest diff. peak and hole           | 1.151 and -0.647                                                               | 0.612 and -0.733                                                                              | 0.969 and -0.561                                                                              |



**Table S3.** Data collection and structure refinement details for compounds **2d**, **2e** and **2h**.

| Compound                                 | <b>2d</b>                                                                                     | <b>2e</b>                                                                                     | <b>2h</b>                                                                                     |
|------------------------------------------|-----------------------------------------------------------------------------------------------|-----------------------------------------------------------------------------------------------|-----------------------------------------------------------------------------------------------|
| CCDC No.                                 | CCDC-1463746                                                                                  | CCDC-1463747                                                                                  | CCDC-1463748                                                                                  |
| Formula                                  | C <sub>32</sub> H <sub>36</sub> Au <sub>2</sub> Cl <sub>2</sub> O <sub>5</sub> P <sub>2</sub> | C <sub>32</sub> H <sub>40</sub> Au <sub>2</sub> Cl <sub>2</sub> N <sub>4</sub> P <sub>2</sub> | C <sub>40</sub> H <sub>28</sub> Au <sub>2</sub> F <sub>10</sub> O <sub>4</sub> P <sub>2</sub> |
| Formula weight<br>[g·mol <sup>-1</sup> ] | 1027.38                                                                                       | 1007.45                                                                                       | 1218.50                                                                                       |
| Temperature [K]                          | 100(2)                                                                                        | 100(2)                                                                                        | 100(2)                                                                                        |
| Wave length [Å]                          | 0.71073                                                                                       | 0.71073                                                                                       | 0.71073                                                                                       |
| Crystal system                           | triclinic                                                                                     | triclinic                                                                                     | triclinic                                                                                     |
| Space group                              | <i>P</i> -1 (2)                                                                               | <i>P</i> -1 (2)                                                                               | <i>P</i> -1 (2)                                                                               |
| a [Å]                                    | 10.9838(5)                                                                                    | 11.4972(5)                                                                                    | 7.3242(5)                                                                                     |
| b [Å]                                    | 12.5329(6)                                                                                    | 15.3421(7)                                                                                    | 11.2949(8)                                                                                    |
| c [Å]                                    | 13.3045(6)                                                                                    | 21.1914(10)                                                                                   | 13.0454(9)                                                                                    |
| α [°]                                    | 77.741(2)                                                                                     | 94.108(2)                                                                                     | 110.027(2)                                                                                    |
| β [°]                                    | 80.078(2)                                                                                     | 90.027(2)                                                                                     | 105.628(2)                                                                                    |
| γ [°]                                    | 75.775(2)                                                                                     | 92.970(2)                                                                                     | 93.035(2)                                                                                     |
| Volume [Å <sup>3</sup> ]                 | 1720.84(14)                                                                                   | 3723.3(3)                                                                                     | 963.80(12)                                                                                    |
| Z                                        | 2                                                                                             | 4                                                                                             | 1                                                                                             |
| Calc. density [Mg·m <sup>-3</sup> ]      | 1.983                                                                                         | 1.797                                                                                         | 2.099                                                                                         |
| μ (MoKα) [mm <sup>-1</sup> ]             | 8.801                                                                                         | 8.127                                                                                         | 7.776                                                                                         |
| F(000)                                   | 980                                                                                           | 1928                                                                                          | 578                                                                                           |
| Crystal dimensions<br>[mm]               | 0.23 x 0.09 x 0.06                                                                            | 0.26 x 0.14 x 0.03                                                                            | 0.15 x 0.11 x 0.02                                                                            |
| Theta range [°]                          | 2.44 to 24.99                                                                                 | 1.33to 25.00                                                                                  | 2.91 to 24.99                                                                                 |
| Index ranges                             | -13 ≤ k ≤ 13<br>-14 ≤ k ≤ 14<br>-15 ≤ k ≤ 15                                                  | -13 ≤ h ≤ 13<br>-18 ≤ k ≤ 18<br>-25 ≤ l ≤ 25                                                  | -8 ≤ h ≤ 8<br>-13 ≤ k ≤ 13<br>-15 ≤ l ≤ 15                                                    |
| Reflections collected                    | 21898                                                                                         | 41029                                                                                         | 11518                                                                                         |
| Independent reflections                  | 6032 [ <i>R</i> <sub>int</sub> = 0.0481]                                                      | 13083 [ <i>R</i> <sub>int</sub> = 0.0936]                                                     | 3400 [ <i>R</i> <sub>int</sub> = 0.0304]                                                      |
| Data/Restraints/Parameter                | 6032 / 0 / 368                                                                                | 13083 / 0 / 767                                                                               | 3400 / 0 / 246                                                                                |
| Goodness-of-fit on F <sup>2</sup>        | 1.025                                                                                         | 1.055                                                                                         | 1.087                                                                                         |
| Final R indices<br>[I > 2σ(I)]           | <i>R</i> 1 = 0.0364<br>w <i>R</i> 2 = 0.0832                                                  | <i>R</i> 1 = 0.0488<br>w <i>R</i> 2 = 0.0790                                                  | <i>R</i> 1 = 0.0226<br>w <i>R</i> 2 = 0.0522                                                  |
| <i>R</i> indices (all data)              | <i>R</i> 1 = 0.0536<br>w <i>R</i> 2 = 0.0909                                                  | <i>R</i> 1 = 0.0918<br>w <i>R</i> 2 = 0.0911                                                  | <i>R</i> 1 = 0.0247<br>w <i>R</i> 2 = 0.0530                                                  |
| Largest diff. peak and<br>hole           | 2.286 and -1.777                                                                              | 1.09 and -1.208                                                                               | 2.087 and -0.863                                                                              |

2.1 Crystal Structure Determination of **1d**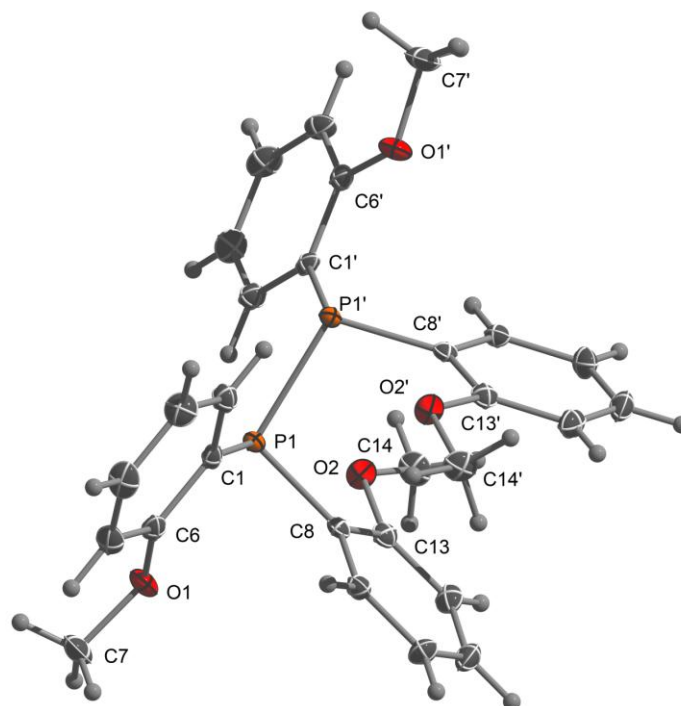

**Figure S7.** ORTEP Plot of compound **1d**. Ellipsoids are drawn at the 50% probability level.

**Table S4.** Atomic coordinates ( $\times 10^4$ ) and equivalent isotropic displacement parameters ( $\text{\AA}^2 \times 10^3$ ) for compound **1d**.  $U(\text{eq})$  is defined as one third of the trace of the orthogonalized  $U_{ij}$  tensor.

|       | x       | y        | z       | $U(\text{eq})$ |
|-------|---------|----------|---------|----------------|
| P(1)  | 4533(1) | 602(1)   | 2907(1) | 11(1)          |
| C(1)  | 5327(1) | 1308(2)  | 3551(1) | 13(1)          |
| O(1)  | 4005(1) | 1098(2)  | 4170(1) | 19(1)          |
| O(2)  | 3414(1) | -1657(2) | 2170(1) | 17(1)          |
| C(2)  | 6256(1) | 1777(2)  | 3492(1) | 17(1)          |
| C(3)  | 6770(2) | 2491(3)  | 3992(1) | 22(1)          |
| C(4)  | 6348(2) | 2746(3)  | 4562(1) | 23(1)          |
| C(5)  | 5426(2) | 2285(3)  | 4641(1) | 20(1)          |
| C(6)  | 4920(1) | 1576(2)  | 4140(1) | 15(1)          |
| C(7)  | 3513(2) | 1521(3)  | 4720(1) | 24(1)          |
| C(8)  | 4369(1) | -1585(2) | 3085(1) | 13(1)          |
| C(9)  | 4771(1) | -2376(3) | 3609(1) | 15(1)          |
| C(10) | 4615(2) | -4039(3) | 3724(1) | 19(1)          |
| C(11) | 4042(2) | -4934(3) | 3313(1) | 21(1)          |
| C(12) | 3628(1) | -4184(3) | 2786(1) | 19(1)          |
| C(13) | 3787(1) | -2521(3) | 2675(1) | 15(1)          |
| C(14) | 2938(2) | -2584(3) | 1684(1) | 21(1)          |

**Table S5.** Anisotropic displacement parameters ( $\text{\AA}^2 \times 10^3$ ) for compound **1d**. The anisotropic displacement factor exponent takes the form:  $-2p^2 [h^2 a^{*2} U^{11} + \dots + 2 h k a^* b^* U^{12}]$ .

|       | U <sup>11</sup> | U <sup>22</sup> | U <sup>33</sup> | U <sup>23</sup> | U <sup>13</sup> | U <sup>12</sup> |
|-------|-----------------|-----------------|-----------------|-----------------|-----------------|-----------------|
| P(1)  | 13(1)           | 11(1)           | 9(1)            | -1(1)           | 1(1)            | 0(1)            |
| C(1)  | 17(1)           | 10(1)           | 11(1)           | 0(1)            | -2(1)           | 2(1)            |
| O(1)  | 19(1)           | 25(1)           | 12(1)           | -2(1)           | 5(1)            | 2(1)            |
| O(2)  | 18(1)           | 17(1)           | 15(1)           | 0(1)            | -5(1)           | -1(1)           |
| C(2)  | 19(1)           | 16(1)           | 15(1)           | -2(1)           | 0(1)            | 0(1)            |
| C(3)  | 19(1)           | 24(1)           | 23(1)           | -2(1)           | -4(1)           | -3(1)           |
| C(4)  | 28(1)           | 23(1)           | 17(1)           | -4(1)           | -9(1)           | 1(1)            |
| C(5)  | 29(1)           | 19(1)           | 12(1)           | 0(1)            | -2(1)           | 5(1)            |
| C(6)  | 20(1)           | 12(1)           | 12(1)           | 1(1)            | -1(1)           | 2(1)            |
| C(7)  | 26(1)           | 31(1)           | 17(1)           | -1(1)           | 9(1)            | 7(1)            |
| C(8)  | 11(1)           | 14(1)           | 13(1)           | 0(1)            | 5(1)            | 1(1)            |
| C(9)  | 17(1)           | 16(1)           | 12(1)           | -2(1)           | 2(1)            | -1(1)           |
| C(10) | 23(1)           | 17(1)           | 18(1)           | 5(1)            | 0(1)            | 3(1)            |
| C(11) | 21(1)           | 12(1)           | 29(1)           | 2(1)            | 4(1)            | 0(1)            |
| C(12) | 16(1)           | 16(1)           | 24(1)           | -3(1)           | 2(1)            | -4(1)           |
| C(13) | 11(1)           | 16(1)           | 17(1)           | 1(1)            | 3(1)            | 1(1)            |
| C(14) | 19(1)           | 25(1)           | 17(1)           | -4(1)           | -5(1)           | -4(1)           |

## 2.2 Crystal Structure Determination of **1f**

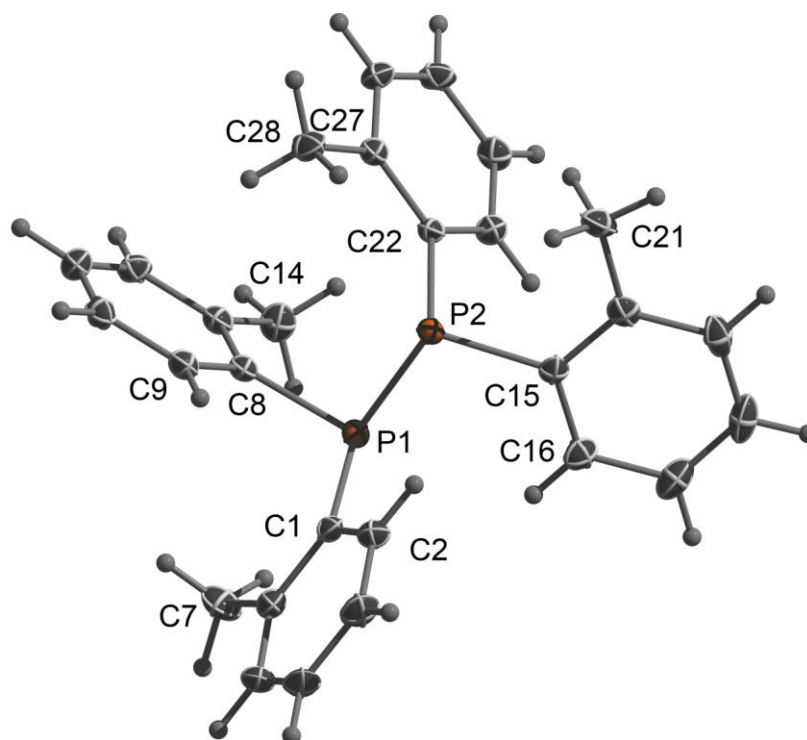

**Figure S8.** ORTEP Plot of compound **1f**. Ellipsoids are drawn at the 50% probability level.

**Table S6.** Atomic coordinates ( $\times 10^4$ ) and equivalent isotropic displacement parameters ( $\text{\AA}^2 \times 10^3$ ) for compound **1f**.  $U(\text{eq})$  is defined as one third of the trace of the orthogonalized  $U_{ij}$  tensor.

|       | x        | y        | z       | U(eq) |
|-------|----------|----------|---------|-------|
| P(1)  | 733(1)   | 7363(1)  | 3163(1) | 14(1) |
| C(1)  | -1570(2) | 7012(1)  | 2796(1) | 15(1) |
| P(2)  | 886(1)   | 7142(1)  | 4335(1) | 14(1) |
| C(2)  | -2653(2) | 6582(1)  | 3196(1) | 20(1) |
| C(3)  | -4393(2) | 6342(1)  | 2893(1) | 25(1) |
| C(4)  | -5076(2) | 6548(1)  | 2191(1) | 27(1) |
| C(5)  | -4002(2) | 6960(1)  | 1782(1) | 23(1) |
| C(6)  | -2235(2) | 7179(1)  | 2068(1) | 18(1) |
| C(7)  | -1076(2) | 7588(1)  | 1594(1) | 23(1) |
| C(8)  | 333(2)   | 8488(1)  | 3169(1) | 14(1) |
| C(9)  | -1344(2) | 8800(1)  | 3258(1) | 17(1) |
| C(10) | -1678(2) | 9639(1)  | 3243(1) | 20(1) |
| C(11) | -324(2)  | 10178(1) | 3137(1) | 22(1) |
| C(12) | 1335(2)  | 9879(1)  | 3042(1) | 22(1) |
| C(13) | 1698(2)  | 9035(1)  | 3051(1) | 17(1) |
| C(14) | 3533(2)  | 8748(1)  | 2939(1) | 25(1) |
| C(15) | 1736(2)  | 6079(1)  | 4418(1) | 16(1) |
| C(16) | 1729(2)  | 5576(1)  | 3819(1) | 21(1) |
| C(17) | 2237(2)  | 4755(1)  | 3890(1) | 27(1) |
| C(18) | 2746(2)  | 4425(1)  | 4568(1) | 30(1) |
| C(19) | 2747(2)  | 4913(1)  | 5167(1) | 28(1) |
| C(20) | 2244(2)  | 5738(1)  | 5110(1) | 21(1) |
| C(21) | 2281(3)  | 6241(1)  | 5781(1) | 30(1) |
| C(22) | 2948(2)  | 7755(1)  | 4625(1) | 15(1) |
| C(23) | 4634(2)  | 7473(1)  | 4518(1) | 17(1) |
| C(24) | 6176(2)  | 7944(1)  | 4716(1) | 19(1) |
| C(25) | 6042(2)  | 8709(1)  | 5026(1) | 22(1) |
| C(26) | 4380(2)  | 8988(1)  | 5146(1) | 19(1) |
| C(27) | 2818(2)  | 8526(1)  | 4953(1) | 16(1) |
| C(28) | 1052(2)  | 8864(1)  | 5099(1) | 22(1) |

**Table S7.** Anisotropic displacement parameters ( $\text{\AA}^2 \times 10^3$ ) for compound **1f**. The anisotropic displacement factor exponent takes the form:  $-2p^2 [h^2 a^{*2} U^{11} + \dots + 2 h k a^* b^* U^{12}]$ .

|      | U11   | U22   | U33   | U23    | U13   | U12   |
|------|-------|-------|-------|--------|-------|-------|
| P(1) | 13(1) | 12(1) | 16(1) | 2(1)   | 2(1)  | 0(1)  |
| C(1) | 15(1) | 10(1) | 19(1) | -2(1)  | 2(1)  | 1(1)  |
| P(2) | 13(1) | 14(1) | 16(1) | 1(1)   | 2(1)  | 0(1)  |
| C(2) | 22(1) | 19(1) | 20(1) | -2(1)  | 5(1)  | -2(1) |
| C(3) | 20(1) | 25(1) | 32(1) | -8(1)  | 9(1)  | -7(1) |
| C(4) | 16(1) | 27(1) | 36(1) | -14(1) | -1(1) | -1(1) |
| C(5) | 24(1) | 20(1) | 22(1) | -7(1)  | -5(1) | 5(1)  |
| C(6) | 22(1) | 12(1) | 19(1) | -3(1)  | 1(1)  | 3(1)  |
| C(7) | 34(1) | 18(1) | 16(1) | 3(1)   | 1(1)  | 1(1)  |
| C(8) | 16(1) | 12(1) | 13(1) | 2(1)   | 0(1)  | -1(1) |

|       |       |       |       |       |       |       |
|-------|-------|-------|-------|-------|-------|-------|
| C(9)  | 17(1) | 16(1) | 18(1) | 1(1)  | 3(1)  | -2(1) |
| C(10) | 19(1) | 17(1) | 22(1) | -2(1) | 3(1)  | 3(1)  |
| C(11) | 29(1) | 12(1) | 24(1) | 1(1)  | 2(1)  | 1(1)  |
| C(12) | 24(1) | 16(1) | 24(1) | 4(1)  | 1(1)  | -7(1) |
| C(13) | 15(1) | 19(1) | 16(1) | 4(1)  | 0(1)  | -2(1) |
| C(14) | 17(1) | 24(1) | 34(1) | 9(1)  | 7(1)  | -2(1) |
| C(15) | 13(1) | 14(1) | 23(1) | 3(1)  | 2(1)  | -2(1) |
| C(16) | 23(1) | 15(1) | 22(1) | 3(1)  | 0(1)  | -2(1) |
| C(17) | 31(1) | 14(1) | 35(1) | -3(1) | 1(1)  | -3(1) |
| C(18) | 32(1) | 11(1) | 44(1) | 7(1)  | -6(1) | -2(1) |
| C(19) | 27(1) | 22(1) | 32(1) | 14(1) | -5(1) | -6(1) |
| C(20) | 16(1) | 22(1) | 23(1) | 6(1)  | 0(1)  | -5(1) |
| C(21) | 37(1) | 34(1) | 20(1) | 8(1)  | 4(1)  | 0(1)  |
| C(22) | 15(1) | 16(1) | 13(1) | 3(1)  | 1(1)  | -1(1) |
| C(23) | 18(1) | 16(1) | 15(1) | 2(1)  | 2(1)  | 2(1)  |
| C(24) | 15(1) | 24(1) | 19(1) | 4(1)  | 3(1)  | 2(1)  |
| C(25) | 19(1) | 21(1) | 23(1) | 3(1)  | 1(1)  | -6(1) |
| C(26) | 23(1) | 13(1) | 21(1) | 0(1)  | 2(1)  | -1(1) |
| C(27) | 18(1) | 16(1) | 15(1) | 3(1)  | 2(1)  | 1(1)  |
| C(28) | 21(1) | 20(1) | 26(1) | -6(1) | 4(1)  | 3(1)  |

### 2.3 Crystal Structure Determination of **2a**

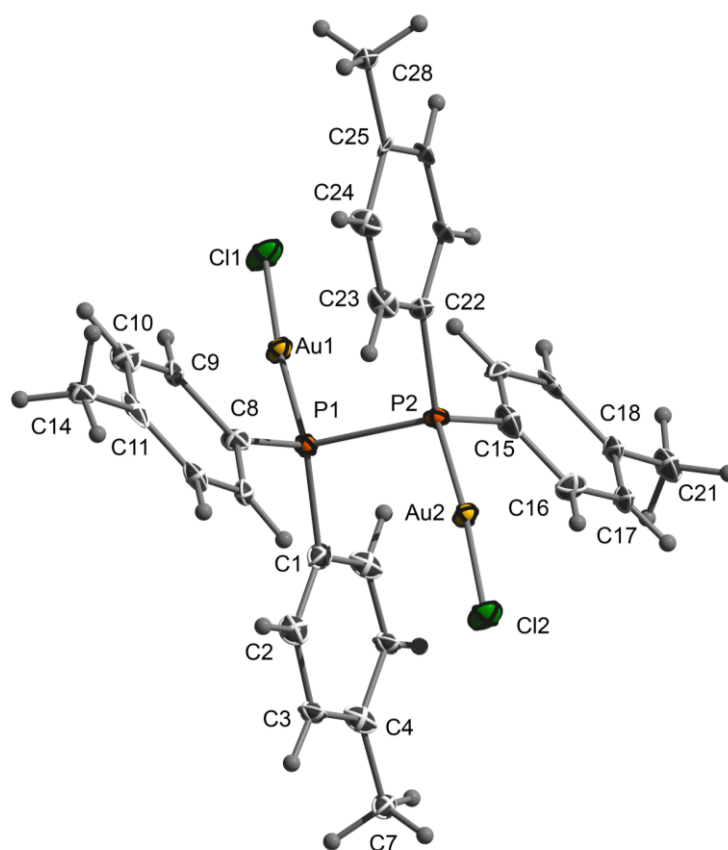

**Figure S9.** ORTEP Plot of compound **2a**. Ellipsoids are drawn at the 50% probability level.

**Table S8.** Atomic coordinates ( $\times 10^4$ ) and equivalent isotropic displacement parameters ( $\text{\AA}^2 \times 10^3$ ) for compound **2a**.  $U(\text{eq})$  is defined as one third of the trace of the orthogonalized  $U_{ij}$  tensor.

|       | x        | y        | z        | U(eq) |
|-------|----------|----------|----------|-------|
| Au(1) | 5511(1)  | 2787(1)  | 5257(1)  | 13(1) |
| Au(2) | 2017(1)  | 2207(1)  | 2655(1)  | 13(1) |
| Cl(1) | 7205(2)  | 3363(1)  | 5752(2)  | 23(1) |
| Cl(2) | 275(2)   | 1711(1)  | 2168(2)  | 21(1) |
| P(1)  | 3826(2)  | 2335(1)  | 4706(1)  | 11(1) |
| P(2)  | 3722(2)  | 2626(1)  | 3206(1)  | 11(1) |
| C(1)  | 2588(7)  | 2907(4)  | 5162(6)  | 14(1) |
| C(2)  | 1534(7)  | 2591(5)  | 5359(5)  | 15(1) |
| C(3)  | 626(7)   | 3106(5)  | 5663(6)  | 15(1) |
| C(4)  | 783(7)   | 3954(5)  | 5730(5)  | 15(1) |
| C(5)  | 1876(6)  | 4292(6)  | 5530(5)  | 15(1) |
| C(6)  | 2741(6)  | 3765(4)  | 5258(5)  | 15(1) |
| C(7)  | -186(6)  | 4520(5)  | 6010(5)  | 14(1) |
| C(8)  | 3608(7)  | 1224(5)  | 4716(6)  | 14(2) |
| C(9)  | 4527(7)  | 719(5)   | 5006(4)  | 14(1) |
| C(10) | 4489(9)  | -131(5)  | 4932(7)  | 15(1) |
| C(11) | 3501(7)  | -528(5)  | 4574(5)  | 19(2) |
| C(12) | 2586(13) | -39(4)   | 4293(9)  | 13(3) |
| C(13) | 2622(7)  | 819(5)   | 4372(5)  | 14(1) |
| C(14) | 3463(7)  | -1458(5) | 4500(6)  | 14(2) |
| C(15) | 3959(8)  | 3749(6)  | 3168(6)  | 22(2) |
| C(16) | 3043(7)  | 4224(5)  | 2852(5)  | 15(2) |
| C(17) | 3113(9)  | 5097(5)  | 2882(7)  | 15(1) |
| C(18) | 4069(7)  | 5493(5)  | 3255(6)  | 15(1) |
| C(19) | 4983(14) | 5001(4)  | 3567(10) | 14(3) |
| C(20) | 4932(7)  | 4143(5)  | 3540(5)  | 14(2) |
| C(21) | 4124(8)  | 6427(5)  | 3318(6)  | 22(2) |
| C(22) | 4933(6)  | 2034(5)  | 2751(6)  | 15(1) |
| C(23) | 4724(6)  | 1193(5)  | 2568(5)  | 15(2) |
| C(24) | 5601(6)  | 701(5)   | 2271(5)  | 15(2) |
| C(25) | 6710(7)  | 999(5)   | 2136(5)  | 14(2) |
| C(26) | 6922(7)  | 1868(6)  | 2334(6)  | 22(2) |
| C(27) | 6047(6)  | 2358(5)  | 2605(6)  | 22(2) |
| C(28) | 7669(6)  | 426(5)   | 1791(5)  | 15(1) |

**Table S9.** Anisotropic displacement parameters ( $\text{\AA}^2 \times 10^3$ ) for compound **2a**. The anisotropic displacement factor exponent takes the form:  $-2p^2 [h^2 a^{*2} U^{11} + \dots + 2 h k a^* b^* U^{12}]$ .

|       | U <sup>11</sup> | U <sup>22</sup> | U <sup>33</sup> | U <sup>23</sup> | U <sup>13</sup> | U <sup>12</sup> |
|-------|-----------------|-----------------|-----------------|-----------------|-----------------|-----------------|
| Au(1) | 11(1)           | 13(1)           | 16(1)           | 1(1)            | -3(1)           | -1(1)           |
| Au(2) | 11(1)           | 14(1)           | 14(1)           | 0(1)            | -1(1)           | 0(1)            |
| Cl(1) | 16(1)           | 17(1)           | 35(1)           | 0(1)            | -9(1)           | -2(1)           |
| Cl(2) | 14(1)           | 22(1)           | 25(1)           | -1(1)           | -7(1)           | -3(1)           |
| P(1)  | 11(1)           | 12(1)           | 11(1)           | 1(1)            | 0(1)            | -1(1)           |
| P(2)  | 9(1)            | 11(1)           | 14(1)           | 0(1)            | 1(1)            | -1(1)           |

---

|       |       |       |       |       |       |       |
|-------|-------|-------|-------|-------|-------|-------|
| C(1)  | 15(3) | 16(3) | 10(3) | -2(3) | -1(2) | 4(3)  |
| C(2)  | 21(3) | 12(3) | 13(3) | -5(3) | 2(3)  | 0(3)  |
| C(3)  | 8(3)  | 23(3) | 13(3) | 1(3)  | 1(2)  | -2(2) |
| C(4)  | 15(3) | 21(3) | 10(3) | -7(3) | 1(3)  | -5(3) |
| C(5)  | 8(3)  | 23(3) | 13(3) | 1(3)  | 1(2)  | -2(2) |
| C(6)  | 15(3) | 21(3) | 10(3) | -7(3) | 1(3)  | -5(3) |
| C(7)  | 15(3) | 16(3) | 10(3) | -2(3) | -1(2) | 4(3)  |
| C(8)  | 16(4) | 9(3)  | 18(4) | -2(2) | 6(3)  | 3(3)  |
| C(9)  | 15(3) | 16(3) | 9(3)  | 4(2)  | 1(2)  | 3(3)  |
| C(10) | 21(3) | 12(3) | 13(3) | -5(3) | 2(3)  | 0(3)  |
| C(11) | 36(5) | 9(4)  | 12(4) | -1(3) | 16(4) | 2(4)  |
| C(12) | 17(7) | 13(7) | 10(7) | 0(3)  | 2(5)  | -6(3) |
| C(13) | 15(3) | 16(3) | 9(3)  | 4(2)  | 1(2)  | 3(3)  |
| C(14) | 16(4) | 9(3)  | 18(4) | -2(2) | 6(3)  | 3(3)  |
| C(15) | 25(4) | 21(4) | 21(4) | 7(3)  | 4(3)  | -4(3) |
| C(16) | 11(4) | 21(4) | 14(5) | -3(3) | -5(4) | -1(3) |
| C(17) | 14(3) | 13(3) | 19(4) | 8(2)  | 2(3)  | 0(2)  |
| C(18) | 14(3) | 13(3) | 19(4) | 8(2)  | 2(3)  | 0(2)  |
| C(19) | 15(6) | 17(7) | 11(7) | 2(3)  | 4(6)  | -9(3) |
| C(20) | 11(4) | 18(4) | 12(4) | -1(3) | 1(3)  | 7(4)  |
| C(21) | 25(4) | 21(4) | 21(4) | 7(3)  | 4(3)  | -4(3) |
| C(22) | 9(3)  | 19(3) | 17(3) | 6(3)  | 2(2)  | 3(2)  |
| C(23) | 15(4) | 18(4) | 12(4) | -3(4) | -2(3) | -8(3) |
| C(24) | 15(4) | 13(4) | 17(4) | -4(3) | 2(3)  | -4(3) |
| C(25) | 10(4) | 20(4) | 10(4) | 7(3)  | 0(3)  | 10(3) |
| C(26) | 10(3) | 29(4) | 27(3) | 20(3) | 7(3)  | 0(3)  |
| C(27) | 10(3) | 29(4) | 27(3) | 20(3) | 7(3)  | 0(3)  |
| C(28) | 9(3)  | 19(3) | 17(3) | 6(3)  | 2(2)  | 3(2)  |

---

2.4 Crystal Structure Determination of **2b**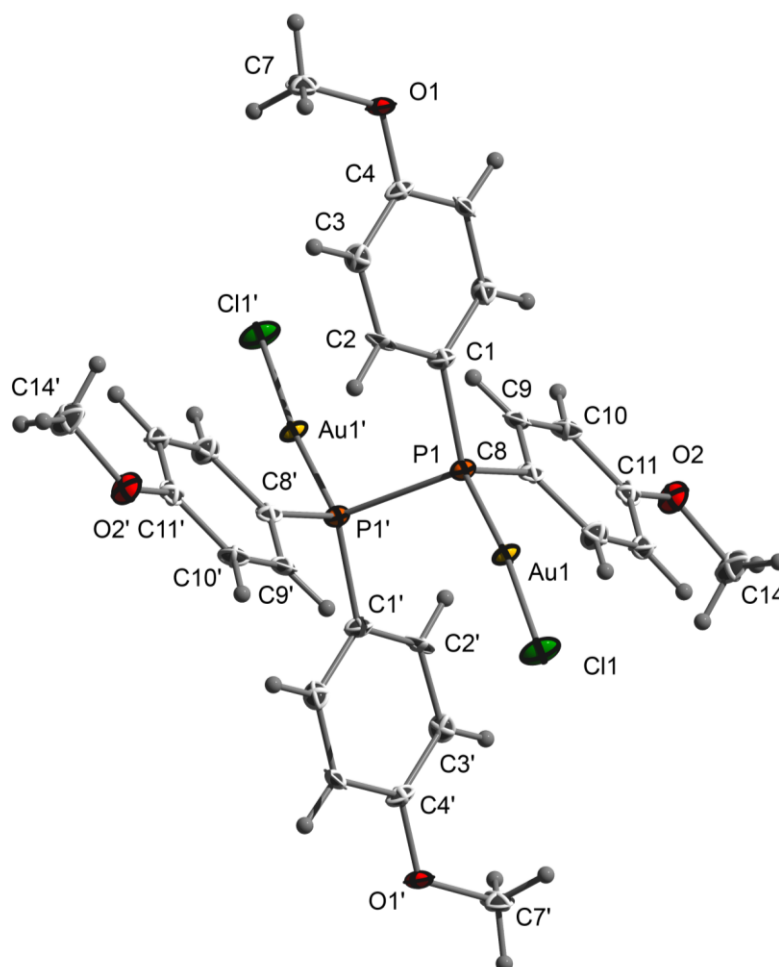

**Figure S10.** ORTEP Plot of compound **2b**. Ellipsoids are drawn at the 50% probability level.

**Table S10.** Atomic coordinates ( $\times 10^4$ ) and equivalent isotropic displacement parameters ( $\text{\AA}^2 \times 10^3$ ) for compound **2b**.  $U(\text{eq})$  is defined as one third of the trace of the orthogonalized  $U_{ij}$  tensor.

|       | x        | y       | z       | U(eq) |
|-------|----------|---------|---------|-------|
| Au(1) | 544(1)   | 3714(1) | 1576(1) | 12(1) |
| Cl(1) | 1371(1)  | 2403(1) | 2346(1) | 21(1) |
| P(1)  | -179(1)  | 4985(1) | 718(1)  | 10(1) |
| O(1)  | -4103(2) | 4692(2) | -245(2) | 14(1) |
| C(1)  | -1377(3) | 4868(3) | 472(3)  | 12(1) |
| O(2)  | 1021(2)  | 9190(2) | 2000(2) | 17(1) |
| C(2)  | -1765(3) | 4000(3) | 8(3)    | 12(1) |
| C(3)  | -2675(3) | 3906(3) | -255(3) | 11(1) |
| C(4)  | -3210(3) | 4685(3) | -6(3)   | 11(1) |
| C(5)  | -2831(3) | 5531(3) | 513(3)  | 13(1) |
| C(6)  | -1922(3) | 5629(3) | 733(3)  | 13(1) |
| C(7)  | -4525(3) | 3987(3) | -956(3) | 17(1) |
| C(8)  | 130(3)   | 6253(3) | 1153(3) | 11(1) |
| C(9)  | -286(3)  | 7150(3) | 739(3)  | 13(1) |
| C(10) | 22(3)    | 8109(3) | 1048(3) | 14(1) |
| C(11) | 768(3)   | 8213(3) | 1746(3) | 12(1) |
| C(12) | 1204(3)  | 7335(3) | 2158(3) | 13(1) |



|       |         |         |         |       |
|-------|---------|---------|---------|-------|
| C(13) | 873(3)  | 6369(3) | 1868(3) | 15(1) |
| C(14) | 1831(3) | 9341(3) | 2655(3) | 21(1) |

**Table S11.** Anisotropic displacement parameters ( $\text{\AA}^2 \times 10^3$ ) for compound **2b**. The anisotropic displacement factor exponent takes the form:  $-2p^2 [ h^2 a^{*2} U^{11} + \dots + 2 h k a^* b^* U^{12} ]$ .

|       | U11   | U22   | U33   | U23   | U13   | U12   |
|-------|-------|-------|-------|-------|-------|-------|
| Au(1) | 10(1) | 10(1) | 13(1) | 3(1)  | 0(1)  | 0(1)  |
| Cl(1) | 17(1) | 16(1) | 28(1) | 9(1)  | -2(1) | 2(1)  |
| P(1)  | 8(1)  | 11(1) | 12(1) | 1(1)  | 1(1)  | 0(1)  |
| O(1)  | 6(2)  | 12(2) | 21(2) | -5(1) | -1(1) | 1(1)  |
| C(1)  | 7(2)  | 14(2) | 14(2) | 1(2)  | 1(2)  | 0(2)  |
| O(2)  | 18(2) | 11(2) | 22(2) | -4(1) | -2(1) | -3(2) |
| C(2)  | 10(2) | 12(2) | 14(2) | 5(2)  | 6(2)  | 8(2)  |
| C(3)  | 14(2) | 6(2)  | 13(2) | 0(2)  | 2(2)  | -1(2) |
| C(4)  | 7(2)  | 13(2) | 13(2) | 4(2)  | 0(2)  | -2(2) |
| C(5)  | 12(2) | 16(2) | 11(2) | -1(2) | 6(2)  | 5(2)  |
| C(6)  | 14(2) | 13(2) | 13(2) | -2(2) | 4(2)  | -5(2) |
| C(7)  | 8(2)  | 20(3) | 24(3) | -4(2) | 4(2)  | -3(2) |
| C(8)  | 7(2)  | 14(2) | 13(2) | -2(2) | 4(2)  | -3(2) |
| C(9)  | 8(2)  | 15(2) | 16(3) | -1(2) | 5(2)  | 3(2)  |
| C(10) | 11(2) | 12(2) | 18(3) | 1(2)  | 3(2)  | 4(2)  |
| C(11) | 12(3) | 14(2) | 11(2) | 0(2)  | 5(2)  | -2(2) |
| C(12) | 10(2) | 16(3) | 13(2) | 1(2)  | 2(2)  | 1(2)  |
| C(13) | 16(2) | 14(2) | 14(2) | 3(2)  | 2(2)  | 2(2)  |
| C(14) | 19(3) | 16(3) | 27(3) | -5(2) | -3(2) | -5(2) |

2.5 Crystal Structure Determination of **2c**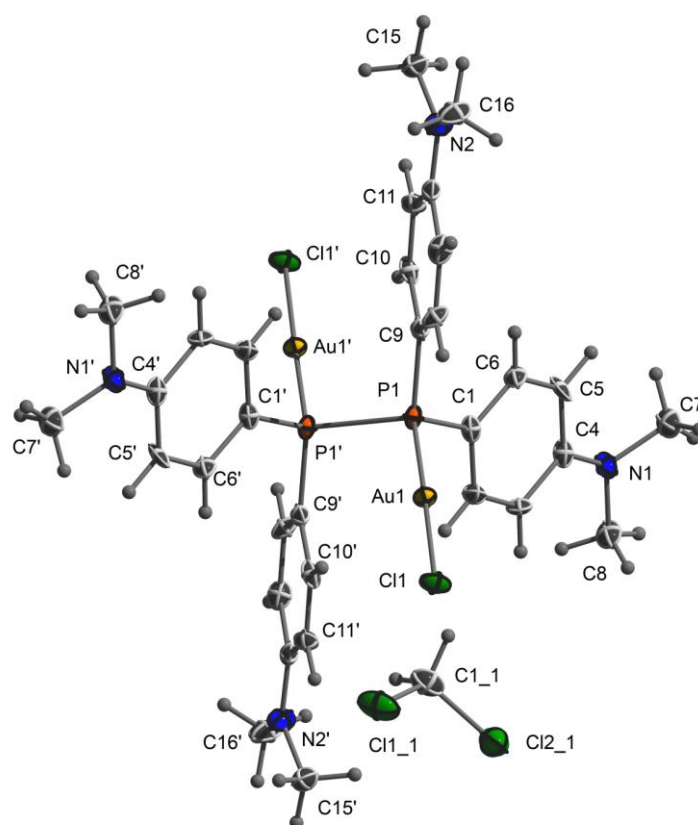

**Figure S11.** ORTEP Plot of compound **2c**. Ellipsoids are drawn at the 50% probability level.

**Table S12.** Atomic coordinates ( $\times 10^4$ ) and equivalent isotropic displacement parameters ( $\text{\AA}^2 \times 10^3$ ) for compound **2c**.  $U(\text{eq})$  is defined as one third of the trace of the orthogonalized  $U_{ij}$  tensor.

|       | x       | y        | z       | $U(\text{eq})$ |
|-------|---------|----------|---------|----------------|
| Au(1) | 7013(1) | 1802(1)  | 2680(1) | 15(1)          |
| Cl(1) | 9215(1) | 2562(1)  | 1304(1) | 23(1)          |
| P(1)  | 4903(1) | 962(1)   | 4023(1) | 15(1)          |
| N(1)  | 2468(4) | -1326(4) | 1289(5) | 20(1)          |
| C(1)  | 4119(5) | 280(5)   | 3236(5) | 15(1)          |
| N(2)  | 951(5)  | 5248(5)  | 5933(5) | 23(1)          |
| C(2)  | 4881(5) | -715(5)  | 2693(5) | 18(1)          |
| C(3)  | 4354(5) | -1228(6) | 2034(5) | 18(1)          |
| C(4)  | 3010(5) | -766(5)  | 1899(5) | 16(1)          |
| C(5)  | 2273(5) | 250(5)   | 2414(6) | 19(1)          |
| C(6)  | 2814(5) | 756(5)   | 3074(5) | 18(1)          |
| C(7)  | 1396(5) | -492(6)  | 649(6)  | 25(1)          |
| C(8)  | 3314(6) | -2333(6) | 712(6)  | 24(1)          |
| C(9)  | 3689(5) | 2201(5)  | 4627(5) | 15(1)          |
| C(10) | 2336(5) | 1856(5)  | 5571(5) | 15(1)          |
| C(11) | 1456(5) | 2845(5)  | 6017(5) | 18(1)          |
| C(12) | 1849(5) | 4255(5)  | 5537(5) | 18(1)          |
| C(13) | 3211(5) | 4579(6)  | 4615(5) | 20(1)          |
| C(14) | 4108(5) | 3585(5)  | 4166(5) | 18(1)          |

|       |          |         |          |       |
|-------|----------|---------|----------|-------|
| C(15) | -346(5)  | 4797(6) | 7097(6)  | 26(1) |
| C(16) | 1410(6)  | 6671(6) | 5450(6)  | 28(1) |
| Cl11  | 13613(2) | 4449(2) | 155(2)   | 40(1) |
| C11   | 12282(6) | 3943(6) | -135(6)  | 29(1) |
| Cl21  | 12802(2) | 3865(2) | -1783(2) | 38(1) |

**Table S13.** Anisotropic displacement parameters ( $\text{\AA}^2 \times 10^3$ ) for compound **2c**. The anisotropic displacement factor exponent takes the form:  $-2p^2 [ h^2 a^{*2} U^{11} + \dots + 2 h k a^* b^* U^{12} ]$ .

|       | U <sup>11</sup> | U <sup>22</sup> | U <sup>33</sup> | U <sup>23</sup> | U <sup>13</sup> | U <sup>12</sup> |
|-------|-----------------|-----------------|-----------------|-----------------|-----------------|-----------------|
| Au(1) | 14(1)           | 15(1)           | 15(1)           | -6(1)           | -4(1)           | -2(1)           |
| Cl(1) | 15(1)           | 23(1)           | 28(1)           | -10(1)          | -2(1)           | -3(1)           |
| P(1)  | 16(1)           | 14(1)           | 14(1)           | -5(1)           | -5(1)           | -2(1)           |
| N(1)  | 22(2)           | 19(3)           | 26(3)           | -12(2)          | -13(2)          | 3(2)            |
| C(1)  | 18(3)           | 14(3)           | 14(3)           | -3(2)           | -8(2)           | -2(2)           |
| N(2)  | 29(3)           | 16(2)           | 21(3)           | -8(2)           | -4(2)           | 0(2)            |
| C(2)  | 13(3)           | 23(3)           | 17(3)           | -10(2)          | -4(2)           | 2(2)            |
| C(3)  | 18(3)           | 20(3)           | 18(3)           | -13(2)          | -4(2)           | 6(2)            |
| C(4)  | 22(3)           | 12(3)           | 15(3)           | -3(2)           | -9(2)           | -4(2)           |
| C(5)  | 20(3)           | 15(3)           | 29(3)           | -11(2)          | -18(2)          | 10(2)           |
| C(6)  | 23(3)           | 16(3)           | 18(3)           | -10(2)          | -9(2)           | 3(2)            |
| C(7)  | 26(3)           | 27(3)           | 30(3)           | -16(3)          | -14(3)          | 1(3)            |
| C(8)  | 34(3)           | 21(3)           | 26(3)           | -14(3)          | -15(3)          | 3(3)            |
| C(9)  | 16(3)           | 16(3)           | 15(3)           | -6(2)           | -9(2)           | 2(2)            |
| C(10) | 21(3)           | 8(3)            | 18(3)           | -3(2)           | -12(2)          | -1(2)           |
| C(11) | 13(3)           | 21(3)           | 18(3)           | -6(2)           | -4(2)           | -1(2)           |
| C(12) | 23(3)           | 19(3)           | 13(3)           | -6(2)           | -10(2)          | 2(2)            |
| C(13) | 26(3)           | 17(3)           | 18(3)           | -6(2)           | -8(2)           | -5(2)           |
| C(14) | 20(3)           | 19(3)           | 16(3)           | -10(2)          | -2(2)           | -5(2)           |
| C(15) | 24(3)           | 29(3)           | 19(3)           | -10(3)          | -2(2)           | 3(3)            |
| C(16) | 33(3)           | 21(3)           | 28(3)           | -15(3)          | -3(3)           | 0(3)            |
| Cl11  | 26(1)           | 46(1)           | 64(1)           | -35(1)          | -15(1)          | 0(1)            |
| C11   | 23(3)           | 24(3)           | 37(4)           | -9(3)           | -9(3)           | -2(3)           |
| Cl21  | 36(1)           | 42(1)           | 44(1)           | -23(1)          | -18(1)          | 8(1)            |

2.6 Crystal Structure Determination of **2d**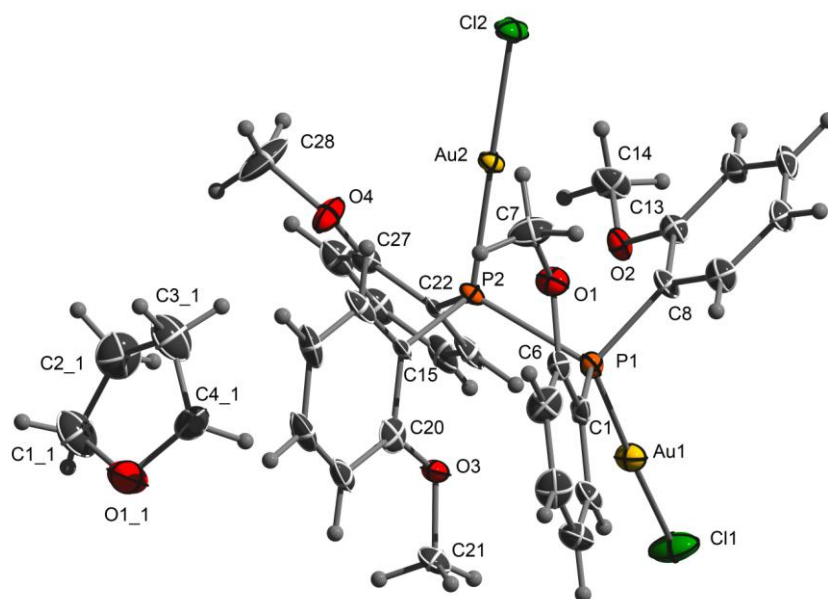

**Figure S12.** ORTEP Plot of compound **2d**. Ellipsoids are drawn at the 50% probability level.

**Table S14.** Atomic coordinates ( $\times 10^4$ ) and equivalent isotropic displacement parameters ( $\text{\AA}^2 \times 10^3$ ) for compound **2d**.  $U(\text{eq})$  is defined as one third of the trace of the orthogonalized  $U_{ij}$  tensor.

|       | x       | y       | z       | $U(\text{eq})$ |
|-------|---------|---------|---------|----------------|
| Au(1) | 4620(1) | 4678(1) | 2928(1) | 24(1)          |
| Cl(1) | 6141(3) | 5620(2) | 2967(2) | 43(1)          |
| P(1)  | 3121(2) | 3785(2) | 2821(2) | 15(1)          |
| O(1)  | 777(5)  | 2866(5) | 3226(4) | 22(1)          |
| C(1)  | 1999(8) | 3700(6) | 3981(6) | 17(2)          |
| Au(2) | 2507(1) | 1806(1) | 1393(1) | 14(1)          |
| Cl(2) | 1198(2) | 1611(2) | 316(2)  | 24(1)          |
| P(2)  | 3704(2) | 2005(2) | 2516(2) | 14(1)          |
| O(2)  | 4107(5) | 3876(4) | 716(4)  | 18(1)          |
| C(2)  | 2213(8) | 4071(7) | 4828(6) | 20(2)          |
| O(3)  | 4668(5) | 2088(5) | 4407(4) | 21(1)          |
| C(3)  | 1439(8) | 3970(7) | 5770(7) | 26(2)          |
| O(4)  | 5026(5) | -74(5)  | 1923(5) | 28(1)          |
| C(4)  | 438(9)  | 3466(8) | 5841(7) | 30(2)          |
| C(5)  | 186(8)  | 3083(7) | 5028(7) | 25(2)          |
| C(6)  | 958(8)  | 3211(7) | 4092(6) | 22(2)          |
| C(7)  | -264(9) | 2364(8) | 3286(7) | 34(2)          |
| C(8)  | 2269(7) | 4510(7) | 1749(6) | 17(2)          |
| C(9)  | 1017(8) | 5141(7) | 1879(7) | 23(2)          |
| C(10) | 440(8)  | 5747(7) | 1033(7) | 24(2)          |
| C(11) | 1088(8) | 5704(7) | 51(7)   | 25(2)          |
| C(12) | 2316(8) | 5089(7) | -114(6) | 22(2)          |
| C(13) | 2895(7) | 4496(7) | 744(6)  | 18(2)          |
| C(14) | 4757(8) | 3627(8) | -264(6) | 29(2)          |
| C(15) | 3390(7) | 1197(6) | 3793(6) | 15(1)          |
| C(16) | 2587(8) | 464(7)  | 3963(6) | 24(1)          |

|       |           |           |          |       |
|-------|-----------|-----------|----------|-------|
| C(17) | 2262(9)   | -112(7)   | 4936(7)  | 28(2) |
| C(18) | 2754(8)   | 65(7)     | 5766(6)  | 28(2) |
| C(19) | 3564(8)   | 771(7)    | 5623(6)  | 26(2) |
| C(20) | 3891(8)   | 1354(7)   | 4642(7)  | 23(2) |
| C(21) | 5131(9)   | 2365(8)   | 5250(7)  | 29(2) |
| C(22) | 5458(7)   | 1652(6)   | 2092(6)  | 15(1) |
| C(23) | 6215(8)   | 2300(7)   | 2010(6)  | 24(1) |
| C(24) | 7501(8)   | 2029(7)   | 1599(6)  | 27(2) |
| C(25) | 7925(8)   | 1025(7)   | 1272(6)  | 25(1) |
| C(26) | 7127(8)   | 302(8)    | 1354(6)  | 25(1) |
| C(27) | 5866(8)   | 600(7)    | 1785(6)  | 22(2) |
| C(28) | 5439(10)  | -1091(9)  | 1509(10) | 50(3) |
| O11   | 11565(7)  | -1607(6)  | 3264(5)  | 47(2) |
| C21   | 12151(10) | -2045(10) | 1590(8)  | 47(3) |
| C31   | 10765(10) | -1475(9)  | 1691(8)  | 46(2) |
| C41   | 10622(10) | -956(8)   | 2634(8)  | 38(2) |
| C11   | 12429(10) | -2365(10) | 2677(8)  | 46(2) |

**Table S15.** Anisotropic displacement parameters ( $\text{\AA}^2 \times 10^3$ ) for compound **2d**. The anisotropic displacement factor exponent takes the form:  $-2p^2 [h^2 a^{*2} U^{11} + \dots + 2 h k a^* b^* U^{12}]$ .

|       | U11   | U22   | U33   | U23    | U13    | U12    |
|-------|-------|-------|-------|--------|--------|--------|
| Au(1) | 25(1) | 26(1) | 22(1) | -5(1)  | -5(1)  | -8(1)  |
| Cl(1) | 45(2) | 56(2) | 41(1) | -19(1) | -2(1)  | -30(1) |
| P(1)  | 14(1) | 16(1) | 14(1) | -2(1)  | -1(1)  | -1(1)  |
| O(1)  | 20(3) | 27(3) | 21(3) | -2(3)  | -2(3)  | -11(3) |
| C(1)  | 23(5) | 11(4) | 13(4) | 3(3)   | -1(3)  | -4(3)  |
| Au(2) | 12(1) | 17(1) | 14(1) | -3(1)  | -3(1)  | -1(1)  |
| Cl(2) | 18(1) | 31(1) | 24(1) | -9(1)  | -10(1) | 0(1)   |
| P(2)  | 10(1) | 17(1) | 13(1) | -1(1)  | -3(1)  | -2(1)  |
| O(2)  | 14(3) | 20(3) | 15(3) | 0(2)   | 1(2)   | 2(2)   |
| C(2)  | 17(4) | 21(4) | 17(4) | 1(3)   | -5(3)  | 1(4)   |
| O(3)  | 24(3) | 24(3) | 17(3) | -6(2)  | -9(3)  | -2(3)  |
| C(3)  | 25(5) | 33(5) | 20(5) | -5(4)  | -6(4)  | -5(4)  |
| O(4)  | 19(3) | 21(3) | 45(4) | -15(3) | -2(3)  | -2(3)  |
| C(4)  | 28(5) | 34(5) | 23(5) | -7(4)  | 11(4)  | -3(4)  |
| C(5)  | 18(5) | 28(5) | 27(5) | -8(4)  | 9(4)   | -10(4) |
| C(6)  | 26(5) | 16(4) | 22(4) | -2(4)  | -10(4) | 2(4)   |
| C(7)  | 28(5) | 47(6) | 35(5) | -18(5) | 0(4)   | -16(5) |
| C(8)  | 14(4) | 20(4) | 17(4) | 1(3)   | -5(3)  | 0(3)   |
| C(9)  | 20(5) | 25(5) | 22(4) | -1(4)  | 1(4)   | -6(4)  |
| C(10) | 20(5) | 21(5) | 31(5) | -5(4)  | -11(4) | 4(4)   |
| C(11) | 23(5) | 17(4) | 35(5) | 6(4)   | -16(4) | -2(4)  |
| C(12) | 28(5) | 21(4) | 16(4) | 3(3)   | -4(4)  | -8(4)  |
| C(13) | 14(4) | 21(4) | 22(4) | 1(4)   | -4(3)  | -8(4)  |
| C(14) | 26(5) | 39(5) | 17(4) | -7(4)  | 4(4)   | -2(4)  |
| C(15) | 18(3) | 14(3) | 8(3)  | 0(2)   | -5(2)  | 5(2)   |
| C(16) | 15(3) | 30(3) | 17(3) | 2(3)   | -4(3)  | 7(3)   |
| C(17) | 26(5) | 22(5) | 26(5) | 10(4)  | -2(4)  | 2(4)   |

|       |       |       |       |        |        |        |
|-------|-------|-------|-------|--------|--------|--------|
| C(18) | 29(5) | 29(5) | 15(4) | 6(4)   | 0(4)   | 6(4)   |
| C(19) | 30(5) | 22(5) | 18(4) | 0(4)   | -7(4)  | 10(4)  |
| C(20) | 14(4) | 22(4) | 28(5) | -8(4)  | 1(4)   | 8(4)   |
| C(21) | 28(5) | 31(5) | 29(5) | -4(4)  | -17(4) | -2(4)  |
| C(22) | 18(3) | 14(3) | 8(3)  | 0(2)   | -5(2)  | 5(2)   |
| C(23) | 15(3) | 30(3) | 17(3) | 2(3)   | -4(3)  | 7(3)   |
| C(24) | 28(5) | 30(5) | 24(5) | 14(4)  | -7(4)  | -17(4) |
| C(25) | 12(3) | 35(4) | 22(3) | -1(3)  | 2(3)   | 1(3)   |
| C(26) | 12(3) | 35(4) | 22(3) | -1(3)  | 2(3)   | 1(3)   |
| C(27) | 19(5) | 28(5) | 18(4) | -5(4)  | -3(4)  | -2(4)  |
| C(28) | 36(6) | 45(6) | 85(9) | -45(6) | 4(6)   | -18(5) |
| O11   | 63(5) | 48(5) | 38(4) | 1(4)   | -23(4) | -21(4) |
| C21   | 33(6) | 54(7) | 48(7) | -13(6) | 7(5)   | -5(5)  |
| C31   | 28(4) | 55(5) | 49(5) | 1(4)   | -8(4)  | -1(4)  |
| C41   | 54(7) | 27(5) | 37(6) | -12(4) | -8(5)  | -7(5)  |
| C11   | 28(4) | 55(5) | 49(5) | 1(4)   | -8(4)  | -1(4)  |

## 2.7 Crystal Structure Determination of **2e**

The molecular structure contained two strongly disordered DCM molecules. Refinement was done by using the squeeze routine in platon.<sup>2</sup>

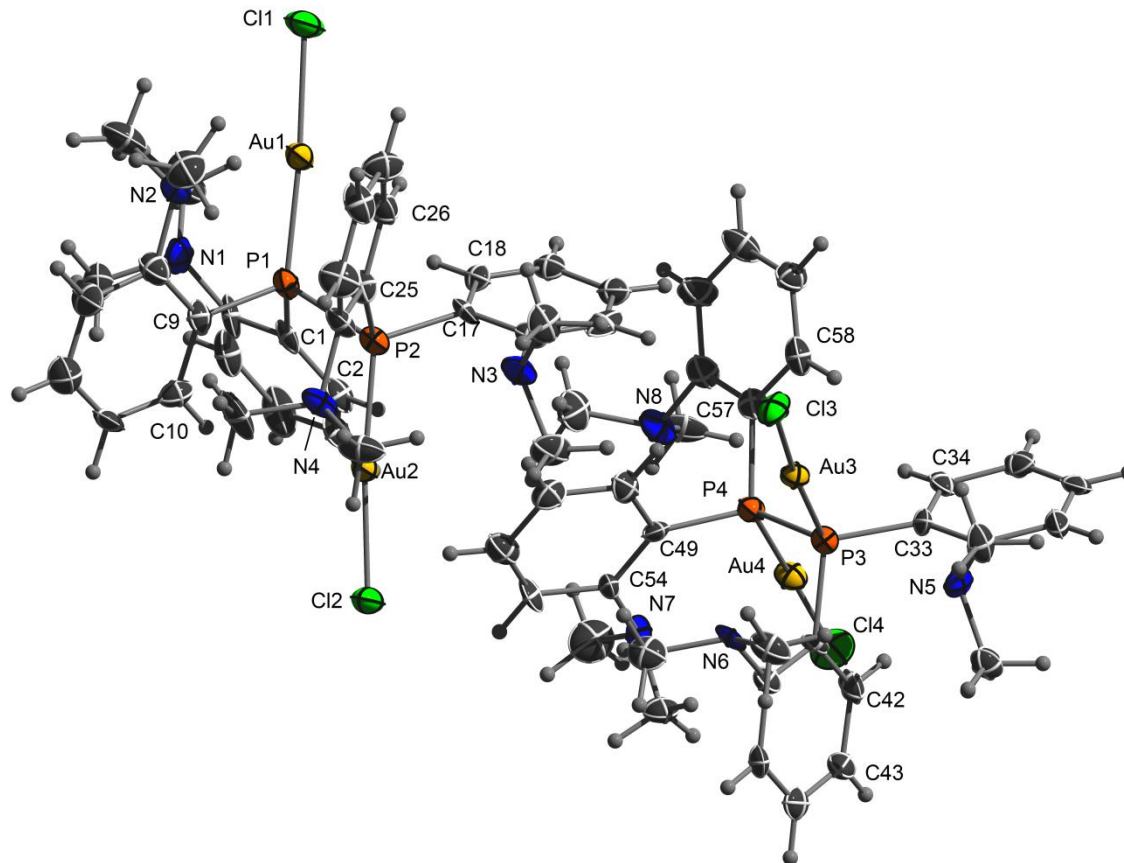

**Figure S13.** ORTEP Plot of compound **2e**. Ellipsoids are drawn at the 50% probability level.

**Table S16.** Atomic coordinates ( $\times 10^4$ ) and equivalent isotropic displacement parameters ( $\text{\AA}^2 \times 10^3$ ) for compound **2e**.  $U(\text{eq})$  is defined as one third of the trace of the orthogonalized  $U_{ij}$  tensor.

|       | x         | y       | z        | U(eq) |
|-------|-----------|---------|----------|-------|
| Au(1) | 11267(1)  | 2386(1) | 3292(1)  | 30(1) |
| Au(2) | 7485(1)   | 2367(1) | 1508(1)  | 24(1) |
| Au(3) | 13298(1)  | 2773(1) | -1485(1) | 23(1) |
| Au(4) | 16627(1)  | 2557(1) | -3462(1) | 27(1) |
| Cl(1) | 13024(3)  | 2714(2) | 3804(2)  | 50(1) |
| Cl(2) | 5726(2)   | 2132(2) | 993(2)   | 35(1) |
| Cl(3) | 11667(2)  | 3042(2) | -897(1)  | 32(1) |
| Cl(4) | 18302(3)  | 2085(2) | -3928(2) | 47(1) |
| P(1)  | 9568(3)   | 1979(2) | 2828(1)  | 24(1) |
| P(2)  | 9186(2)   | 2740(2) | 1995(1)  | 24(1) |
| P(3)  | 14881(2)  | 2408(2) | -2035(1) | 22(1) |
| P(4)  | 15038(2)  | 3018(2) | -2964(1) | 23(1) |
| N(1)  | 9283(8)   | 1018(6) | 3928(4)  | 33(3) |
| N(2)  | 11610(8)  | 778(6)  | 2467(5)  | 34(3) |
| N(3)  | 9141(8)   | 4176(6) | 1180(5)  | 31(2) |
| N(4)  | 9354(8)   | 1777(6) | 668(4)   | 29(2) |
| N(5)  | 14995(7)  | 1143(5) | -1071(4) | 23(2) |
| N(6)  | 15446(7)  | 3813(5) | -957(4)  | 22(2) |
| N(7)  | 17034(8)  | 4424(5) | -3099(4) | 26(2) |
| N(8)  | 14471(8)  | 3746(6) | -4094(4) | 35(3) |
| C(1)  | 8266(9)   | 2025(6) | 3327(5)  | 22(3) |
| C(2)  | 7309(9)   | 2520(7) | 3217(5)  | 29(2) |
| C(3)  | 6369(10)  | 2518(7) | 3614(5)  | 29(2) |
| C(4)  | 6370(11)  | 2000(7) | 4119(6)  | 44(4) |
| C(5)  | 7327(11)  | 1513(7) | 4234(6)  | 39(3) |
| C(6)  | 8269(10)  | 1515(6) | 3833(5)  | 29(3) |
| C(7)  | 8998(10)  | 67(7)   | 3897(6)  | 42(3) |
| C(8)  | 9916(10)  | 1276(8) | 4509(5)  | 45(4) |
| C(9)  | 9471(9)   | 878(6)  | 2446(5)  | 24(3) |
| C(10) | 8369(9)   | 484(7)  | 2296(5)  | 27(3) |
| C(11) | 8263(10)  | -366(7) | 2023(5)  | 30(3) |
| C(12) | 9207(11)  | -831(8) | 1882(6)  | 47(4) |
| C(13) | 10307(10) | -451(7) | 2012(6)  | 46(4) |
| C(14) | 10467(10) | 408(7)  | 2301(6)  | 32(3) |
| C(15) | 12119(10) | 363(8)  | 2984(6)  | 45(4) |
| C(16) | 12376(10) | 815(8)  | 1928(6)  | 48(4) |
| C(17) | 9267(9)   | 3871(6) | 2303(5)  | 22(3) |
| C(18) | 9260(8)   | 4177(6) | 2946(5)  | 22(3) |
| C(19) | 9161(8)   | 5050(7) | 3142(5)  | 24(3) |
| C(20) | 9045(9)   | 5652(7) | 2673(5)  | 29(3) |
| C(21) | 9059(8)   | 5375(8) | 2044(6)  | 31(3) |
| C(22) | 9148(9)   | 4494(7) | 1846(5)  | 25(3) |
| C(23) | 8049(10)  | 4369(7) | 854(5)   | 40(3) |
| C(24) | 10185(9)  | 4458(7) | 831(5)   | 33(3) |
| C(25) | 10486(9)  | 2587(6) | 1530(5)  | 22(3) |

|       |           |         |          |       |
|-------|-----------|---------|----------|-------|
| C(26) | 11558(10) | 2972(7) | 1759(6)  | 30(3) |
| C(27) | 12556(10) | 2940(8) | 1395(6)  | 37(3) |
| C(28) | 12505(10) | 2507(7) | 793(5)   | 32(3) |
| C(29) | 11475(10) | 2139(8) | 561(6)   | 35(3) |
| C(30) | 10464(10) | 2167(7) | 914(5)   | 28(3) |
| C(31) | 9296(12)  | 821(7)  | 662(6)   | 56(4) |
| C(32) | 9042(10)  | 2072(8) | 48(6)    | 42(3) |
| C(33) | 14891(9)  | 1242(6) | -2212(5) | 19(3) |
| C(34) | 14804(8)  | 834(7)  | -2823(5) | 25(3) |
| C(35) | 14685(9)  | -75(7)  | -2931(6) | 28(3) |
| C(36) | 14687(9)  | -585(7) | -2413(6) | 30(3) |
| C(37) | 14785(9)  | -199(6) | -1802(6) | 30(3) |
| C(38) | 14906(9)  | 719(6)  | -1707(5) | 24(3) |
| C(39) | 14022(10) | 918(7)  | -669(5)  | 31(3) |
| C(40) | 16117(9)  | 986(7)  | -762(5)  | 30(3) |
| C(41) | 16310(9)  | 2722(6) | -1703(5) | 18(2) |
| C(42) | 17288(9)  | 2306(7) | -1953(6) | 31(3) |
| C(43) | 18396(9)  | 2569(7) | -1726(6) | 29(3) |
| C(44) | 18531(10) | 3232(7) | -1235(5) | 29(3) |
| C(45) | 17573(9)  | 3645(6) | -990(6)  | 28(3) |
| C(46) | 16436(9)  | 3400(7) | -1228(5) | 25(3) |
| C(47) | 15160(9)  | 3499(7) | -345(5)  | 35(3) |
| C(48) | 15556(9)  | 4779(7) | -942(5)  | 35(3) |
| C(49) | 15045(9)  | 4176(6) | -2724(5) | 21(3) |
| C(50) | 14029(10) | 4517(7) | -2456(5) | 28(3) |
| C(51) | 13942(9)  | 5413(7) | -2338(5) | 29(3) |
| C(52) | 14885(10) | 5980(7) | -2481(5) | 34(3) |
| C(53) | 15882(10) | 5665(7) | -2714(6) | 34(3) |
| C(54) | 15990(9)  | 4748(6) | -2844(5) | 21(3) |
| C(55) | 17926(9)  | 4363(7) | -2613(6) | 37(3) |
| C(56) | 17533(11) | 4863(8) | -3639(6) | 53(4) |
| C(57) | 13612(9)  | 2791(7) | -3350(5) | 24(3) |
| C(58) | 12708(10) | 2252(6) | -3130(6) | 32(3) |
| C(59) | 11657(10) | 2166(7) | -3457(5) | 29(3) |
| C(60) | 11527(10) | 2581(7) | -4015(6) | 36(3) |
| C(61) | 12413(10) | 3091(7) | -4240(6) | 39(3) |
| C(62) | 13469(10) | 3201(7) | -3906(5) | 31(3) |
| C(63) | 14147(11) | 4655(7) | -4192(6) | 50(4) |
| C(64) | 15016(10) | 3366(8) | -4672(5) | 46(4) |

**Table S17.** Anisotropic displacement parameters ( $\text{\AA}^2 \times 10^3$ ) for compound **2e**. The anisotropic displacement factor exponent takes the form:  $-2p^2 [ h^2 a^{*2} U^{11} + \dots + 2 h k a^* b^* U^{12} ]$ .

|       | U <sup>11</sup> | U <sup>22</sup> | U <sup>33</sup> | U <sup>23</sup> | U <sup>13</sup> | U <sup>12</sup> |
|-------|-----------------|-----------------|-----------------|-----------------|-----------------|-----------------|
| Au(1) | 31(1)           | 26(1)           | 31(1)           | 5(1)            | -7(1)           | -7(1)           |
| Au(2) | 23(1)           | 23(1)           | 26(1)           | 2(1)            | -2(1)           | -3(1)           |
| Au(3) | 20(1)           | 23(1)           | 25(1)           | 2(1)            | 1(1)            | 0(1)            |
| Au(4) | 24(1)           | 29(1)           | 28(1)           | 0(1)            | 3(1)            | -1(1)           |



---

|       |        |       |        |        |        |        |
|-------|--------|-------|--------|--------|--------|--------|
| Cl(1) | 41(2)  | 52(2) | 56(3)  | 18(2)  | -26(2) | -22(2) |
| Cl(2) | 29(2)  | 36(2) | 41(2)  | 8(2)   | -12(2) | -8(1)  |
| Cl(3) | 22(2)  | 35(2) | 40(2)  | 10(2)  | 8(1)   | 9(1)   |
| Cl(4) | 37(2)  | 58(2) | 46(2)  | 1(2)   | 15(2)  | 12(2)  |
| P(1)  | 29(2)  | 19(2) | 24(2)  | 3(1)   | 1(2)   | -2(1)  |
| P(2)  | 22(2)  | 22(2) | 25(2)  | -1(1)  | 0(1)   | -4(1)  |
| P(3)  | 22(2)  | 20(2) | 24(2)  | 2(1)   | -1(1)  | -1(1)  |
| P(4)  | 22(2)  | 22(2) | 25(2)  | 2(1)   | -1(1)  | -3(1)  |
| N(1)  | 45(7)  | 28(6) | 27(6)  | 9(5)   | -3(5)  | 2(5)   |
| N(2)  | 36(6)  | 25(5) | 39(7)  | -5(5)  | -13(5) | -1(5)  |
| N(3)  | 24(6)  | 35(6) | 33(7)  | 5(5)   | 5(5)   | -7(5)  |
| N(4)  | 30(6)  | 33(6) | 23(6)  | -3(5)  | -2(5)  | -10(5) |
| N(5)  | 26(5)  | 27(5) | 19(6)  | 7(4)   | -1(4)  | 2(4)   |
| N(6)  | 24(5)  | 19(5) | 20(6)  | -11(4) | -2(4)  | -7(4)  |
| N(7)  | 30(6)  | 19(5) | 27(6)  | -5(4)  | 11(5)  | 6(4)   |
| N(8)  | 38(6)  | 39(6) | 27(6)  | 7(5)   | 3(5)   | -12(5) |
| C(1)  | 29(7)  | 11(5) | 24(7)  | -8(5)  | 7(5)   | -4(5)  |
| C(2)  | 31(5)  | 26(4) | 30(6)  | 8(4)   | 8(4)   | -9(4)  |
| C(3)  | 31(5)  | 26(4) | 30(6)  | 8(4)   | 8(4)   | -9(4)  |
| C(4)  | 50(9)  | 30(7) | 51(9)  | -5(7)  | 35(7)  | 0(7)   |
| C(5)  | 61(9)  | 23(7) | 34(8)  | 5(6)   | 9(7)   | -3(7)  |
| C(6)  | 46(8)  | 10(6) | 32(8)  | 3(5)   | 14(6)  | -2(6)  |
| C(7)  | 49(9)  | 27(7) | 50(9)  | 7(6)   | -6(7)  | 1(6)   |
| C(8)  | 54(9)  | 58(9) | 23(8)  | 13(7)  | -11(7) | -21(7) |
| C(9)  | 30(7)  | 19(6) | 24(7)  | 4(5)   | 8(6)   | -1(5)  |
| C(10) | 21(6)  | 37(7) | 24(7)  | 6(6)   | 1(5)   | 3(6)   |
| C(11) | 28(7)  | 28(7) | 34(8)  | 2(6)   | -11(6) | -14(6) |
| C(12) | 44(9)  | 35(8) | 60(10) | 0(7)   | -4(8)  | 1(7)   |
| C(13) | 25(7)  | 27(7) | 83(12) | -15(7) | -1(7)  | 10(6)  |
| C(14) | 25(7)  | 29(7) | 40(8)  | -5(6)  | 5(6)   | -3(6)  |
| C(15) | 42(8)  | 53(9) | 38(9)  | -3(7)  | -4(7)  | -20(7) |
| C(16) | 41(8)  | 50(9) | 54(10) | 0(7)   | 8(7)   | 7(7)   |
| C(17) | 22(6)  | 14(6) | 28(7)  | -3(5)  | -2(5)  | -9(5)  |
| C(18) | 19(6)  | 21(6) | 26(7)  | -3(5)  | 1(5)   | 4(5)   |
| C(19) | 19(6)  | 29(6) | 25(7)  | -4(5)  | 1(5)   | 3(5)   |
| C(20) | 24(7)  | 32(7) | 30(8)  | -1(6)  | -4(6)  | 1(6)   |
| C(21) | 11(6)  | 49(8) | 36(8)  | 20(7)  | 8(6)   | 4(6)   |
| C(22) | 18(6)  | 29(7) | 28(7)  | -4(6)  | 0(5)   | -3(5)  |
| C(23) | 45(8)  | 51(8) | 24(8)  | 11(6)  | -11(6) | -6(7)  |
| C(24) | 46(8)  | 36(7) | 16(7)  | 11(6)  | 6(6)   | -3(6)  |
| C(25) | 22(6)  | 21(6) | 21(7)  | -1(5)  | 11(5)  | 3(5)   |
| C(26) | 36(7)  | 22(6) | 30(8)  | -2(6)  | -4(6)  | 0(6)   |
| C(27) | 32(7)  | 51(8) | 29(8)  | 6(7)   | -3(6)  | 1(7)   |
| C(28) | 42(8)  | 28(7) | 25(8)  | 2(6)   | 13(6)  | -5(6)  |
| C(29) | 34(8)  | 46(8) | 25(8)  | 1(6)   | 10(6)  | -1(6)  |
| C(30) | 35(7)  | 25(6) | 22(7)  | 0(5)   | -4(6)  | -14(6) |
| C(31) | 82(11) | 27(7) | 55(10) | -14(7) | -2(9)  | -22(7) |
| C(32) | 30(7)  | 56(9) | 37(9)  | -11(7) | -7(6)  | -6(7)  |
| C(33) | 20(6)  | 11(5) | 26(7)  | -1(5)  | -3(5)  | 4(5)   |
| C(34) | 16(6)  | 22(6) | 37(8)  | -1(6)  | 1(6)   | -6(5)  |

---

|       |       |        |        |       |        |        |
|-------|-------|--------|--------|-------|--------|--------|
| C(35) | 23(6) | 28(7)  | 34(8)  | -5(6) | -5(6)  | 7(6)   |
| C(36) | 14(6) | 26(6)  | 48(9)  | -7(6) | -9(6)  | -4(5)  |
| C(37) | 23(7) | 17(6)  | 50(9)  | 4(6)  | -1(6)  | -1(5)  |
| C(38) | 18(6) | 20(6)  | 37(8)  | -2(6) | 6(6)   | 9(5)   |
| C(39) | 51(8) | 24(6)  | 19(7)  | 5(5)  | 1(6)   | -4(6)  |
| C(40) | 37(7) | 29(7)  | 24(7)  | 0(5)  | -4(6)  | -3(6)  |
| C(41) | 22(6) | 21(6)  | 11(6)  | 6(5)  | -8(5)  | -11(5) |
| C(42) | 29(7) | 16(6)  | 47(9)  | -6(6) | 4(6)   | 0(5)   |
| C(43) | 22(7) | 25(6)  | 41(8)  | 8(6)  | -1(6)  | -2(5)  |
| C(44) | 32(7) | 25(6)  | 31(8)  | 15(6) | -2(6)  | -4(6)  |
| C(45) | 31(7) | 11(6)  | 43(8)  | -1(5) | -5(6)  | 2(5)   |
| C(46) | 21(6) | 22(6)  | 33(8)  | 5(5)  | 0(6)   | -4(5)  |
| C(47) | 32(7) | 42(7)  | 29(8)  | -9(6) | 5(6)   | -6(6)  |
| C(48) | 28(7) | 41(7)  | 35(8)  | -6(6) | 8(6)   | 3(6)   |
| C(49) | 14(6) | 24(6)  | 25(7)  | 1(5)  | -6(5)  | 4(5)   |
| C(50) | 35(7) | 27(6)  | 24(7)  | 11(5) | -3(6)  | -4(6)  |
| C(51) | 25(7) | 35(7)  | 29(8)  | 5(6)  | 5(6)   | 5(6)   |
| C(52) | 37(8) | 33(7)  | 30(8)  | 4(6)  | -2(6)  | -8(6)  |
| C(53) | 36(8) | 17(6)  | 49(9)  | 10(6) | 1(7)   | -12(6) |
| C(54) | 23(6) | 11(5)  | 30(7)  | 1(5)  | -9(5)  | -1(5)  |
| C(55) | 18(6) | 39(7)  | 53(9)  | 1(7)  | -2(6)  | 1(6)   |
| C(56) | 47(9) | 68(10) | 46(10) | 16(8) | 12(7)  | 5(8)   |
| C(57) | 15(6) | 23(6)  | 34(8)  | 1(5)  | 12(5)  | 4(5)   |
| C(58) | 40(8) | 19(6)  | 35(8)  | 3(6)  | 3(6)   | -1(6)  |
| C(59) | 24(7) | 32(7)  | 31(8)  | 6(6)  | 1(6)   | -2(6)  |
| C(60) | 37(8) | 38(7)  | 30(8)  | -8(6) | 4(6)   | -11(6) |
| C(61) | 42(8) | 47(8)  | 27(8)  | 4(6)  | -13(7) | -7(7)  |
| C(62) | 42(8) | 29(7)  | 20(7)  | 1(6)  | -4(6)  | -5(6)  |
| C(63) | 46(9) | 43(8)  | 64(11) | 26(8) | 4(8)   | -7(7)  |
| C(64) | 39(8) | 77(10) | 18(8)  | -4(7) | -10(6) | -14(7) |

---

2.8 Crystal Structure Determination of **2h**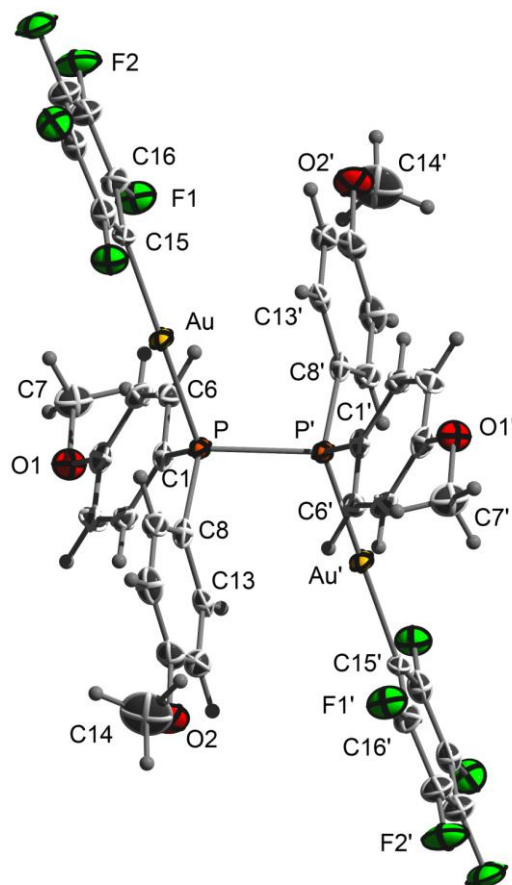

**Figure S14.** ORTEP Plot of compound **2h**. Ellipsoids are drawn at the 50% probability level.

**Table S18.** Atomic coordinates ( $\times 10^4$ ) and equivalent isotropic displacement parameters ( $\text{\AA}^2 \times 10^3$ ) for compound **2h**.  $U(\text{eq})$  is defined as one third of the trace of the orthogonalized  $U_{ij}$  tensor.

|       | x        | y        | z        | U(eq) |
|-------|----------|----------|----------|-------|
| Au(1) | 1524(1)  | 9718(1)  | 3174(1)  | 16(1) |
| P(1)  | 3435(2)  | 9784(1)  | 4894(1)  | 14(1) |
| F(1)  | 668(4)   | 7281(3)  | 947(2)   | 32(1) |
| O(1)  | 2248(5)  | 4525(3)  | 4905(3)  | 25(1) |
| C(1)  | 3179(6)  | 8202(4)  | 4953(4)  | 14(1) |
| F(2)  | -1725(5) | 6601(3)  | -1192(2) | 43(1) |
| O(2)  | 3139(5)  | 14003(3) | 9050(3)  | 34(1) |
| C(2)  | 2760(6)  | 7965(4)  | 5856(4)  | 18(1) |
| F(3)  | -3837(4) | 8309(3)  | -1801(2) | 42(1) |
| C(3)  | 2445(6)  | 6727(4)  | 5805(4)  | 21(1) |
| F(4)  | -3514(4) | 10698(3) | -238(2)  | 33(1) |
| C(4)  | 2552(6)  | 5706(4)  | 4863(4)  | 18(1) |
| F(5)  | -1196(4) | 11373(2) | 1916(2)  | 28(1) |
| C(5)  | 2959(6)  | 5921(4)  | 3955(4)  | 20(1) |

|       |          |          |         |       |
|-------|----------|----------|---------|-------|
| C(6)  | 3248(6)  | 7173(4)  | 4006(4) | 18(1) |
| C(7)  | 2283(8)  | 3455(4)  | 3924(4) | 30(1) |
| C(8)  | 3204(6)  | 10974(4) | 6191(4) | 14(1) |
| C(9)  | 2032(6)  | 11870(4) | 6039(4) | 20(1) |
| C(10) | 1966(6)  | 12906(4) | 6980(4) | 24(1) |
| C(11) | 3052(7)  | 13037(4) | 8066(4) | 23(1) |
| C(12) | 4214(6)  | 12121(4) | 8214(4) | 22(1) |
| C(13) | 4268(6)  | 11097(4) | 7274(4) | 16(1) |
| C(14) | 2075(10) | 15007(5) | 8962(6) | 53(2) |
| C(15) | -190(6)  | 9356(5)  | 1533(4) | 21(1) |
| C(16) | -373(6)  | 8162(4)  | 689(4)  | 21(1) |
| C(17) | -1582(7) | 7778(5)  | -423(4) | 28(1) |
| C(18) | -2659(7) | 8631(5)  | -730(4) | 28(1) |
| C(19) | -2483(6) | 9851(4)  | 78(4)   | 23(1) |
| C(20) | -1257(6) | 10176(4) | 1188(4) | 23(1) |

**Table S19.** Anisotropic displacement parameters ( $\text{\AA}^2 \times 10^3$ ) for compound **2h**. The anisotropic displacement factor exponent takes the form:  $-2p^2 [h^2 a^{*2} U^{11} + \dots + 2 h k a^* b^* U^{12}]$ .

|       | U <sup>11</sup> | U <sup>22</sup> | U <sup>33</sup> | U <sup>23</sup> | U <sup>13</sup> | U <sup>12</sup> |
|-------|-----------------|-----------------|-----------------|-----------------|-----------------|-----------------|
| Au(1) | 13(1)           | 21(1)           | 14(1)           | 9(1)            | 0(1)            | 1(1)            |
| P(1)  | 13(1)           | 15(1)           | 11(1)           | 5(1)            | 1(1)            | 2(1)            |
| F(1)  | 37(2)           | 29(2)           | 29(2)           | 10(1)           | 6(1)            | 16(1)           |
| O(1)  | 34(2)           | 16(2)           | 25(2)           | 9(2)            | 9(2)            | 2(1)            |
| C(1)  | 10(1)           | 15(2)           | 21(2)           | 11(1)           | 3(1)            | 2(1)            |
| F(2)  | 56(2)           | 39(2)           | 23(2)           | 0(1)            | 7(1)            | 14(2)           |
| O(2)  | 41(2)           | 24(2)           | 29(2)           | -3(2)           | 13(2)           | 9(2)            |
| C(2)  | 17(2)           | 16(2)           | 15(2)           | 3(2)            | 4(2)            | 3(2)            |
| F(3)  | 39(2)           | 53(2)           | 20(2)           | 10(2)           | -6(1)           | 6(2)            |
| C(3)  | 23(2)           | 25(2)           | 20(2)           | 14(2)           | 7(2)            | 3(2)            |
| F(4)  | 29(2)           | 44(2)           | 36(2)           | 27(2)           | 7(1)            | 17(1)           |
| C(4)  | 13(2)           | 17(2)           | 23(2)           | 9(2)            | 2(2)            | 1(2)            |
| F(5)  | 34(2)           | 24(2)           | 26(2)           | 8(1)            | 9(1)            | 9(1)            |
| C(5)  | 20(2)           | 16(2)           | 18(2)           | 4(2)            | 4(2)            | 1(2)            |
| C(6)  | 20(2)           | 19(2)           | 14(2)           | 7(2)            | 4(2)            | 0(2)            |
| C(7)  | 40(3)           | 16(2)           | 29(3)           | 8(2)            | 8(2)            | 2(2)            |
| C(8)  | 10(1)           | 15(2)           | 21(2)           | 11(1)           | 3(1)            | 2(1)            |
| C(9)  | 17(2)           | 24(2)           | 20(2)           | 10(2)           | 4(2)            | 2(2)            |
| C(10) | 20(2)           | 21(2)           | 35(3)           | 13(2)           | 12(2)           | 11(2)           |
| C(11) | 24(2)           | 18(2)           | 25(3)           | 1(2)            | 12(2)           | 2(2)            |
| C(12) | 21(2)           | 23(2)           | 20(2)           | 6(2)            | 6(2)            | 0(2)            |
| C(13) | 15(2)           | 15(2)           | 21(2)           | 6(2)            | 11(2)           | 2(2)            |
| C(14) | 73(5)           | 28(3)           | 55(4)           | 2(3)            | 29(4)           | 25(3)           |
| C(15) | 15(2)           | 36(3)           | 12(2)           | 11(2)           | 3(2)            | -2(2)           |
| C(16) | 18(2)           | 24(2)           | 21(2)           | 10(2)           | 4(2)            | 8(2)            |
| C(17) | 25(2)           | 37(2)           | 20(2)           | 10(2)           | 2(1)            | 3(2)            |
| C(18) | 25(2)           | 37(2)           | 20(2)           | 10(2)           | 2(1)            | 3(2)            |
| C(19) | 19(2)           | 24(2)           | 29(2)           | 10(2)           | 12(1)           | 4(1)            |
| C(20) | 19(2)           | 24(2)           | 29(2)           | 10(2)           | 12(1)           | 4(1)            |

### 3. References

---

[1] G. M. Sheldrick, *Acta Cryst.* **2008**, *A64*, 112–122.

[2] A. L. Spek, *J. Appl. Cryst.* 2003, **36**, 7-13.
